# Supplementary material for: Blood-based omic profiling supports female susceptibility to tobacco smoke-induced cardiovascular diseases
Source: PubMed Central journal article supplement (PMC5320491; doi:10.1038/srep42870), 2017-02-22

## SUPPLEMENTARY INFORMATION

### **Blood-based omic profiling supports female susceptibility to tobacco smoke-induced cardiovascular diseases**

**Authors:** Aristotelis Chatziioannou, Panagiotis Georgiadis, Dennie G. Hebels, Irene Liampa, Ioannis Valavanis, Ingvar A. Bergdahl, Anders Johansson, Domenico Palli, Marc Chadeau-Hyam, Alexandros P. Siskos, Hector Keun, Maria Botsivali, Theo M.C.M. de Kok, Almudena Espín Pérez, Jos C.S. Kleinjans, Paolo Vineis and Soterios A. Kyrtopoulos, the EnviroGenomarkers project consortium

Supplementary Table S1: Probes and associated genes differentially expressed in current smokers (FDR&lt;0.10)

| probe no.    | gene         | raw p value | FDR      | foldchange expression |
|--------------|--------------|-------------|----------|-----------------------|
| A_24_P187766 | LRRNB        | <1E-17      | <1E-17   | 1.95                  |
| A_23_P64611  | P2RY6        | <1E-17      | <1E-17   | 1.38                  |
| A_23_P31376  | LRRNB        | <1E-17      | <1E-17   | 1.96                  |
| A_23_P428129 | CDKN1C       | 4.85E-14    | 3.60E-10 | 0.65                  |
| A_23_P115785 | FANK1        | 1.39E-11    | 8.23E-08 | 1.43                  |
| A_24_P904484 | LOC283174    | 4.74E-10    | 2.34E-06 | 1.32                  |
| A_23_P150789 | PRSS23       | 2.13E-09    | 9.03E-06 | 0.70                  |
| A_24_P937405 | PRSS23       | 8.17E-09    | 3.03E-05 | 0.70                  |
| A_32_P63013  | LOC283174    | 1.16E-08    | 3.81E-05 | 1.32                  |
| A_23_P61042  |              | 3.26E-08    | 9.09E-05 | 1.57                  |
| A_23_P138492 | NEURL        | 3.37E-08    | 9.09E-05 | 0.82                  |
| A_23_P26386  | TPPP3        | 4.46E-08    | 1.00E-04 | 0.75                  |
| A_23_P211680 | MLC1         | 4.80E-08    | 1.00E-04 | 0.77                  |
| A_23_P87421  |              | 6.09E-08    | 1.00E-04 | 0.71                  |
| A_23_P253375 | CUX1         | 7.75E-08    | 2.00E-04 | 0.84                  |
| A_24_P511686 | LOC100506870 | 1.03E-07    | 2.00E-04 | 1.23                  |
| A_23_P12514  | RHOC         | 1.19E-07    | 2.00E-04 | 0.83                  |
| A_23_P53081  | OSBPL5       | 1.37E-07    | 2.00E-04 | 0.79                  |
| A_23_P93442  | SASH1        | 1.41E-07    | 2.00E-04 | 1.32                  |
| A_23_P371276 | C18orf23     | 1.69E-07    | 3.00E-04 | 0.76                  |
| A_23_P358709 | AHRR         | 1.96E-07    | 3.00E-04 | 1.73                  |
| A_23_P40847  | CHST2        | 2.55E-07    | 3.00E-04 | 0.80                  |
| A_23_P325562 | SLC1A7       | 2.94E-07    | 4.00E-04 | 0.76                  |
| A_23_P160720 | BATF3        | 3.23E-07    | 4.00E-04 | 0.81                  |
| A_23_P351148 | SH2D1B       | 3.68E-07    | 4.00E-04 | 0.75                  |
| A_24_P300379 | PI16         | 3.99E-07    | 5.00E-04 | 1.22                  |
| A_24_P245838 | MGAT3        | 4.18E-07    | 5.00E-04 | 1.34                  |
| A_23_P119042 | NKG7         | 4.82E-07    | 5.00E-04 | 0.81                  |
| A_23_P379736 | B3GNT9       | 4.84E-07    | 5.00E-04 | 1.15                  |
| A_23_P74088  | MMP23B       | 5.85E-07    | 6.00E-04 | 0.82                  |
| A_24_P265523 | CR1          | 6.79E-07    | 6.00E-04 | 1.26                  |
| A_23_P107744 | S1PR5        | 8.32E-07    | 8.00E-04 | 0.75                  |
| A_32_P930685 | ZNF876P      | 8.38E-07    | 8.00E-04 | 0.80                  |
| A_23_P433760 | SPN          | 1.02E-06    | 9.00E-04 | 0.88                  |
| A_24_P465799 |              | 1.37E-06    | 1.20E-03 | 1.43                  |
| A_23_P373100 | MGC24103     | 1.50E-06    | 1.20E-03 | 0.66                  |
| A_23_P254193 | TTC38        | 1.71E-06    | 1.40E-03 | 0.80                  |
| A_23_P209700 | NMUR1        | 1.82E-06    | 1.40E-03 | 0.79                  |
| A_23_P254654 | CLIC3        | 2.00E-06    | 1.50E-03 | 0.80                  |
| A_32_P324533 | SH2D1B       | 2.30E-06    | 1.70E-03 | 0.76                  |
| A_23_P152559 | BZRAP1       | 2.31E-06    | 1.70E-03 | 0.83                  |
| A_23_P206284 | GPR56        | 2.34E-06    | 1.70E-03 | 0.81                  |
| A_32_P171061 | ASCL2        | 2.84E-06    | 1.90E-03 | 0.82                  |
| A_23_P3083   |              | 2.89E-06    | 1.90E-03 | 0.75                  |
| A_23_P206280 | GPR56        | 3.01E-06    | 2.00E-03 | 0.76                  |
| A_32_P190461 |              | 3.07E-06    | 2.00E-03 | 1.26                  |
| A_23_P43157  | MYBL1        | 3.12E-06    | 2.00E-03 | 0.81                  |
| A_32_P158966 | KLRF1        | 3.18E-06    | 2.00E-03 | 0.78                  |
| A_23_P41528  | FGFBP2       | 3.57E-06    | 2.20E-03 | 0.74                  |
| A_24_P226069 | FGFBP2       | 3.89E-06    | 2.30E-03 | 0.75                  |
| A_23_P146554 | PTGDS        | 4.26E-06    | 2.50E-03 | 0.81                  |
| A_24_P921823 | TCF7L2       | 4.80E-06    | 2.70E-03 | 0.83                  |
| A_23_P102113 | WNT10A       | 5.24E-06    | 2.90E-03 | 1.16                  |
| A_23_P94186  | LYPD2        | 5.44E-06    | 3.00E-03 | 0.79                  |
| A_23_P133445 | GZMA         | 5.95E-06    | 3.20E-03 | 0.80                  |
| A_32_P133916 | BNC2         | 6.06E-06    | 3.20E-03 | 0.73                  |
| A_24_P108311 | NEDD4L       | 6.08E-06    | 3.20E-03 | 1.18                  |
| A_24_P169873 |              | 6.27E-06    | 3.20E-03 | 1.46                  |

|              |          |          |          |      |
|--------------|----------|----------|----------|------|
| A_23_P108042 | NCR1     | 6.99E-06 | 3.50E-03 | 0.79 |
| A_23_P108404 | AGAP1    | 7.27E-06 | 3.50E-03 | 0.81 |
| A_23_P136026 |          | 7.31E-06 | 3.50E-03 | 1.33 |
| A_23_P122662 | GFOD1    | 7.31E-06 | 3.50E-03 | 0.84 |
| A_24_P79403  | PF4      | 8.82E-06 | 4.20E-03 | 0.76 |
| A_32_P429876 | PPM1L    | 9.57E-06 | 4.40E-03 | 0.80 |
| A_24_P88850  | MRAS     | 1.04E-05 | 4.70E-03 | 0.81 |
| A_23_P203351 | MS4A7    | 1.05E-05 | 4.70E-03 | 0.83 |
| A_23_P128230 | NR4A1    | 1.07E-05 | 4.70E-03 | 0.63 |
| A_32_P15035  | GFOD1    | 1.22E-05 | 5.30E-03 | 0.84 |
| A_23_P141555 | TBX21    | 1.25E-05 | 5.40E-03 | 0.80 |
| A_23_P372496 | DNAH12   | 1.29E-05 | 5.50E-03 | 0.71 |
| A_23_P155556 | CLDND1   | 1.35E-05 | 5.60E-03 | 1.15 |
| A_32_P164593 | ZMAT4    | 1.50E-05 | 6.10E-03 | 0.70 |
| A_23_P50946  | RAMP1    | 1.51E-05 | 6.10E-03 | 0.81 |
| A_23_P16976  | ANXA4    | 1.56E-05 | 6.30E-03 | 0.87 |
| A_23_P121596 | PPBP     | 1.71E-05 | 6.70E-03 | 0.74 |
| A_23_P61987  | TMEM121  | 1.72E-05 | 6.70E-03 | 1.17 |
| A_23_P120883 | HMOX1    | 1.77E-05 | 6.80E-03 | 0.84 |
| A_23_P70719  | LAMA2    | 1.85E-05 | 7.00E-03 | 0.82 |
| A_23_P254507 | HOPX     | 1.96E-05 | 7.20E-03 | 0.85 |
| A_24_P154080 | ECE1     | 1.97E-05 | 7.20E-03 | 1.18 |
| A_24_P519504 |          | 1.97E-05 | 7.20E-03 | 1.36 |
| A_24_P353619 | ALPL     | 2.11E-05 | 7.50E-03 | 1.26 |
| A_23_P121533 | SPON2    | 2.11E-05 | 7.50E-03 | 0.77 |
| A_23_P110941 | GSTA4    | 2.18E-05 | 7.60E-03 | 0.87 |
| A_23_P406424 | RHOC     | 2.19E-05 | 7.60E-03 | 0.91 |
| A_24_P156388 | TTC38    | 2.60E-05 | 9.00E-03 | 0.82 |
| A_24_P913146 | HOPX     | 2.65E-05 | 9.10E-03 | 0.84 |
| A_23_P136753 |          | 3.09E-05 | 1.00E-02 | 1.20 |
| A_23_P381714 | CA13     | 3.10E-05 | 1.00E-02 | 0.84 |
| A_23_P346900 | CACNA2D2 | 3.12E-05 | 1.00E-02 | 0.84 |
| A_23_P26994  | GNGT2    | 3.13E-05 | 1.00E-02 | 0.86 |
| A_23_P354341 | CD160    | 3.14E-05 | 1.00E-02 | 0.78 |
| A_32_P87191  | FLJ21408 | 3.14E-05 | 1.00E-02 | 1.29 |
| A_23_P56578  | VIT      | 3.23E-05 | 1.02E-02 | 0.76 |
| A_23_P117602 | GZMB     | 3.26E-05 | 1.02E-02 | 0.80 |
| A_23_P21485  | PID1     | 3.36E-05 | 1.04E-02 | 1.18 |
| A_23_P138117 | CAMTA1   | 3.42E-05 | 1.05E-02 | 0.87 |
| A_23_P97046  | ALPL     | 3.45E-05 | 1.05E-02 | 1.22 |
| A_32_P133564 |          | 3.61E-05 | 1.08E-02 | 1.25 |
| A_23_P1833   | B3GAT1   | 3.73E-05 | 1.10E-02 | 0.77 |
| A_24_P175435 | SLC2A8   | 3.76E-05 | 1.10E-02 | 0.88 |
| A_23_P397671 | CR1      | 3.97E-05 | 1.15E-02 | 1.23 |
| A_32_P12232  | BNC2     | 4.04E-05 | 1.16E-02 | 0.72 |
| A_24_P173754 | C1orf21  | 4.36E-05 | 1.24E-02 | 0.82 |
| A_24_P240166 | PHLDB2   | 4.50E-05 | 1.27E-02 | 0.84 |
| A_24_P395415 |          | 4.67E-05 | 1.30E-02 | 1.30 |
| A_23_P253221 | ARHGEF4  | 4.69E-05 | 1.30E-02 | 1.16 |
| A_23_P4494   | DSC2     | 4.78E-05 | 1.31E-02 | 1.34 |
| A_24_P362805 | GK5      | 4.93E-05 | 1.34E-02 | 0.86 |
| A_23_P406385 | FBXL16   | 4.99E-05 | 1.35E-02 | 1.17 |
| A_32_P69368  | ID2      | 5.27E-05 | 1.41E-02 | 0.86 |
| A_32_P26721  |          | 5.59E-05 | 1.48E-02 | 0.88 |
| A_32_P166693 | HEG1     | 5.74E-05 | 1.51E-02 | 0.87 |
| A_23_P112482 | AQP3     | 5.96E-05 | 1.55E-02 | 1.16 |
| A_23_P1331   | COL13A1  | 6.03E-05 | 1.55E-02 | 0.76 |
| A_23_P113748 | ZNF385D  | 6.05E-05 | 1.55E-02 | 0.76 |
| A_23_P57347  | PCNT     | 6.22E-05 | 1.58E-02 | 0.90 |
| A_23_P213102 | PALLD    | 6.55E-05 | 1.65E-02 | 0.83 |
| A_23_P200780 | TGFBR3   | 7.03E-05 | 1.75E-02 | 0.83 |
| A_24_P272993 | MEG3     | 7.11E-05 | 1.75E-02 | 0.73 |
| A_24_P203000 | IL2RB    | 7.16E-05 | 1.75E-02 | 0.84 |

|              |              |          |          |      |
|--------------|--------------|----------|----------|------|
| A_23_P202881 | FEZ1         | 7.24E-05 | 1.75E-02 | 0.82 |
| A_24_P658584 | SASH1        | 7.28E-05 | 1.75E-02 | 1.31 |
| A_24_P230563 | IL2RA        | 7.30E-05 | 1.75E-02 | 1.18 |
| A_23_P418015 | MAPRE2       | 7.50E-05 | 1.77E-02 | 0.88 |
| A_23_P69171  | SUCNR1       | 7.50E-05 | 1.77E-02 | 0.77 |
| A_24_P417706 | MXD3         | 7.81E-05 | 1.81E-02 | 1.20 |
| A_23_P23834  | LGR6         | 7.87E-05 | 1.81E-02 | 0.78 |
| A_23_P136347 | EPS8         | 7.87E-05 | 1.81E-02 | 0.81 |
| A_23_P93524  | SAMD3        | 8.11E-05 | 1.85E-02 | 0.83 |
| A_23_P25674  | CKB          | 8.37E-05 | 1.89E-02 | 0.84 |
| A_23_P327380 | TP63         | 8.41E-05 | 1.89E-02 | 1.27 |
| A_23_P211039 | ADAMTS1      | 8.59E-05 | 1.92E-02 | 0.79 |
| A_24_P417460 | SFMBT2       | 8.75E-05 | 1.94E-02 | 0.81 |
| A_23_P113161 | C1orf21      | 9.05E-05 | 1.99E-02 | 0.80 |
| A_32_P129310 |              | 9.21E-05 | 2.01E-02 | 1.15 |
| A_23_P32233  | KLF4         | 9.41E-05 | 2.04E-02 | 0.85 |
| A_23_P33768  | ZFYVE9       | 9.98E-05 | 2.13E-02 | 1.16 |
| A_24_P13041  | RTKN2        | 9.99E-05 | 2.13E-02 | 1.24 |
| A_23_P143143 | ID2          | 1.00E-04 | 2.13E-02 | 0.85 |
| A_24_P113131 | BZRAP1       | 1.00E-04 | 2.17E-02 | 0.84 |
| A_32_P34404  |              | 1.00E-04 | 2.20E-02 | 0.86 |
| A_23_P203920 | SSPN         | 1.00E-04 | 2.20E-02 | 1.18 |
| A_23_P366366 | SCRN1        | 1.00E-04 | 2.29E-02 | 0.87 |
| A_23_P146943 | ATP1B1       | 1.00E-04 | 2.30E-02 | 0.84 |
| A_23_P353436 |              | 1.00E-04 | 2.32E-02 | 0.87 |
| A_24_P583225 | NCRNA00265   | 1.00E-04 | 2.42E-02 | 1.18 |
| A_23_P44505  | KLF11        | 1.00E-04 | 2.48E-02 | 0.87 |
| A_23_P53193  | SYTL2        | 1.00E-04 | 2.49E-02 | 0.83 |
| A_24_P343233 | HLA-DRB1     | 1.00E-04 | 2.49E-02 | 0.89 |
| A_23_P138706 | ADRA2A       | 1.00E-04 | 2.69E-02 | 0.81 |
| A_23_P107750 | S1PR5        | 1.00E-04 | 2.77E-02 | 0.80 |
| A_23_P151120 | ACRBP        | 1.00E-04 | 2.77E-02 | 0.81 |
| A_23_P127948 | ADM          | 1.00E-04 | 2.78E-02 | 1.30 |
| A_23_P22096  | PTK2         | 1.00E-04 | 2.81E-02 | 0.84 |
| A_24_P399220 | HOXB3        | 1.00E-04 | 2.82E-02 | 0.82 |
| A_23_P16006  | ZNF600       | 1.00E-04 | 2.82E-02 | 0.87 |
| A_23_P257365 | GFI1         | 2.00E-04 | 2.82E-02 | 0.82 |
| A_24_P173566 |              | 2.00E-04 | 2.82E-02 | 1.24 |
| A_24_P179816 | SLC27A3      | 2.00E-04 | 2.83E-02 | 0.90 |
| A_23_P72989  | CCR4         | 2.00E-04 | 2.83E-02 | 1.18 |
| A_23_P112452 | GGTA1        | 2.00E-04 | 2.95E-02 | 0.78 |
| A_32_P50406  | FLJ45340     | 2.00E-04 | 3.03E-02 | 1.17 |
| A_24_P184803 | COCH         | 2.00E-04 | 3.03E-02 | 1.30 |
| A_23_P98565  | MS4A14       | 2.00E-04 | 3.11E-02 | 0.80 |
| A_24_P24890  |              | 2.00E-04 | 3.27E-02 | 1.31 |
| A_23_P72252  |              | 2.00E-04 | 3.29E-02 | 1.23 |
| A_23_P200685 | MOSC2        | 2.00E-04 | 3.31E-02 | 1.17 |
| A_24_P234554 | ZNF385D      | 2.00E-04 | 3.34E-02 | 0.73 |
| A_23_P43684  | BNC2         | 2.00E-04 | 3.43E-02 | 0.82 |
| A_32_P196669 |              | 2.00E-04 | 3.43E-02 | 1.19 |
| A_23_P51231  | RUNX3        | 2.00E-04 | 3.45E-02 | 0.87 |
| A_23_P8913   | CA2          | 2.00E-04 | 3.47E-02 | 0.81 |
| A_23_P86682  | MYOF         | 2.00E-04 | 3.47E-02 | 0.83 |
| A_24_P589028 |              | 2.00E-04 | 3.55E-02 | 0.73 |
| A_23_P121676 | CXXC4        | 2.00E-04 | 3.55E-02 | 0.76 |
| A_23_P206290 | GPR114       | 2.00E-04 | 3.55E-02 | 0.86 |
| A_23_P43979  |              | 2.00E-04 | 3.55E-02 | 1.23 |
| A_23_P66881  | RGS9         | 2.00E-04 | 3.62E-02 | 0.81 |
| A_23_P39251  | PLIN5        | 2.00E-04 | 3.62E-02 | 1.23 |
| A_23_P99275  | KLRB1        | 2.00E-04 | 3.67E-02 | 0.85 |
| A_23_P109508 | NCF4         | 2.00E-04 | 3.72E-02 | 1.21 |
| A_23_P385105 | PLCD4        | 2.00E-04 | 3.88E-02 | 0.85 |
| A_24_P267814 | LOC100287891 | 2.00E-04 | 3.88E-02 | 1.26 |

|              |          |          |          |      |
|--------------|----------|----------|----------|------|
| A_23_P201376 | SSX2IP   | 2.00E-04 | 3.90E-02 | 0.81 |
| A_24_P743802 | ZNF618   | 2.00E-04 | 3.90E-02 | 0.84 |
| A_23_P39931  | DYSF     | 2.00E-04 | 3.90E-02 | 1.17 |
| A_24_P141481 | CD59     | 3.00E-04 | 3.96E-02 | 1.10 |
| A_23_P109171 | BFSP1    | 3.00E-04 | 3.97E-02 | 0.82 |
| A_23_P336612 | C15orf26 | 3.00E-04 | 3.98E-02 | 0.78 |
| A_23_P347632 | MTSS1    | 3.00E-04 | 3.98E-02 | 0.88 |
| A_23_P259506 | C5orf32  | 3.00E-04 | 3.98E-02 | 1.18 |
| A_23_P213620 | PPP2R2B  | 3.00E-04 | 4.02E-02 | 0.86 |
| A_23_P348257 | NUAK1    | 3.00E-04 | 4.03E-02 | 0.80 |
| A_23_P127128 | DNAJC1   | 3.00E-04 | 4.03E-02 | 0.90 |
| A_23_P99614  | BTBD6    | 3.00E-04 | 4.03E-02 | 0.92 |
| A_23_P48212  | CLEC1B   | 3.00E-04 | 4.07E-02 | 0.79 |
| A_24_P139604 | PYHIN1   | 3.00E-04 | 4.07E-02 | 0.83 |
| A_32_P75141  |          | 3.00E-04 | 4.07E-02 | 0.85 |
| A_24_P339560 | SIGLEC11 | 3.00E-04 | 4.07E-02 | 1.26 |
| A_23_P328740 | NEURL3   | 3.00E-04 | 4.09E-02 | 0.78 |
| A_23_P89249  | ERBB2    | 3.00E-04 | 4.09E-02 | 0.89 |
| A_23_P374902 | CLDND2   | 3.00E-04 | 4.19E-02 | 0.86 |
| A_24_P383523 | SAMD4A   | 3.00E-04 | 4.20E-02 | 0.89 |
| A_23_P209527 | VIL1     | 3.00E-04 | 4.28E-02 | 0.77 |
| A_24_P466590 |          | 3.00E-04 | 4.28E-02 | 0.88 |
| A_24_P104980 | IGLL5    | 3.00E-04 | 4.28E-02 | 1.17 |
| A_24_P119141 | PROS1    | 3.00E-04 | 4.34E-02 | 0.75 |
| A_23_P397937 | SAMD3    | 3.00E-04 | 4.41E-02 | 0.85 |
| A_24_P166443 | HLA-DPB1 | 3.00E-04 | 4.50E-02 | 0.88 |
| A_23_P13232  |          | 3.00E-04 | 4.53E-02 | 0.80 |
| A_23_P157569 | ADHFE1   | 3.00E-04 | 4.53E-02 | 0.87 |
| A_23_P85453  | CD244    | 3.00E-04 | 4.53E-02 | 0.88 |
| A_24_P274219 | EPHA4    | 3.00E-04 | 4.53E-02 | 1.14 |
| A_24_P940166 | PAPSS2   | 3.00E-04 | 4.55E-02 | 0.83 |
| A_23_P397208 | GSTM2    | 3.00E-04 | 4.55E-02 | 0.85 |
| A_32_P25639  | BET3L    | 3.00E-04 | 4.57E-02 | 0.79 |
| A_23_P342275 | ADAMTS1  | 3.00E-04 | 4.64E-02 | 0.80 |
| A_23_P205200 | DHRS12   | 3.00E-04 | 4.64E-02 | 1.14 |
| A_24_P396167 | CTSW     | 3.00E-04 | 4.67E-02 | 0.84 |
| A_23_P216094 | ASPH     | 3.00E-04 | 4.68E-02 | 1.14 |
| A_23_P17633  | IFNAR1   | 4.00E-04 | 4.70E-02 | 1.12 |
| A_23_P434118 | CEACAM1  | 4.00E-04 | 4.74E-02 | 1.16 |
| A_23_P154526 | GRB14    | 4.00E-04 | 4.78E-02 | 0.79 |
| A_23_P214244 | ENPP5    | 4.00E-04 | 4.78E-02 | 0.80 |
| A_23_P163697 | SYT17    | 4.00E-04 | 4.78E-02 | 0.86 |
| A_23_P101093 | COPZ2    | 4.00E-04 | 4.78E-02 | 0.86 |
| A_23_P72050  | PTK2     | 4.00E-04 | 4.78E-02 | 0.86 |
| A_32_P163147 | VSIG1    | 4.00E-04 | 4.78E-02 | 1.10 |
| A_32_P150012 | CHD7     | 4.00E-04 | 4.97E-02 | 1.12 |
| A_24_P184799 | COCH     | 4.00E-04 | 4.98E-02 | 1.32 |
| A_23_P205370 | ASB2     | 4.00E-04 | 5.04E-02 | 1.13 |
| A_23_P31006  | HLA-DRB5 | 4.00E-04 | 5.11E-02 | 0.86 |
| A_24_P414169 | TFDP2    | 4.00E-04 | 5.17E-02 | 0.89 |
| A_24_P129632 | DLG5     | 4.00E-04 | 5.22E-02 | 0.80 |
| A_23_P128728 | ARG2     | 4.00E-04 | 5.22E-02 | 0.81 |
| A_23_P19987  | IGF2BP3  | 4.00E-04 | 5.22E-02 | 0.82 |
| A_23_P104493 | PAPSS2   | 4.00E-04 | 5.22E-02 | 0.84 |
| A_23_P400378 | GPBAR1   | 4.00E-04 | 5.22E-02 | 0.89 |
| A_23_P115417 | RGL1     | 4.00E-04 | 5.22E-02 | 1.11 |
| A_32_P139163 |          | 4.00E-04 | 5.22E-02 | 1.15 |
| A_23_P156826 | C6orf105 | 4.00E-04 | 5.22E-02 | 1.21 |
| A_23_P256821 | CR1      | 4.00E-04 | 5.22E-02 | 1.22 |
| A_23_P421323 |          | 4.00E-04 | 5.22E-02 | 1.28 |
| A_23_P24193  | XPNPEP1  | 4.00E-04 | 5.25E-02 | 0.88 |
| A_23_P138541 | AKR1C3   | 4.00E-04 | 5.33E-02 | 0.81 |
| A_23_P158925 | GPR125   | 5.00E-04 | 5.60E-02 | 0.80 |

|              |          |          |          |      |
|--------------|----------|----------|----------|------|
| A_23_P380614 | ATP9A    | 5.00E-04 | 5.60E-02 | 0.83 |
| A_23_P75325  | SGPL1    | 5.00E-04 | 5.60E-02 | 0.88 |
| A_23_P435390 |          | 5.00E-04 | 5.60E-02 | 1.27 |
| A_23_P412214 | RAP1GAP2 | 5.00E-04 | 5.61E-02 | 0.78 |
| A_23_P56213  | GRAMD1A  | 5.00E-04 | 5.61E-02 | 1.11 |
| A_24_P342178 |          | 5.00E-04 | 5.66E-02 | 1.12 |
| A_23_P48175  | TMEM106C | 5.00E-04 | 5.72E-02 | 0.88 |
| A_23_P1782   | CD82     | 5.00E-04 | 5.72E-02 | 1.11 |
| A_23_P413456 | CIRBP    | 5.00E-04 | 5.72E-02 | 1.18 |
| A_23_P123413 | TOX      | 5.00E-04 | 5.73E-02 | 0.84 |
| A_32_P88120  | YPEL1    | 5.00E-04 | 5.75E-02 | 0.90 |
| A_24_P472081 |          | 5.00E-04 | 5.75E-02 | 1.18 |
| A_32_P156786 |          | 5.00E-04 | 5.75E-02 | 1.22 |
| A_23_P155939 | ZNF595   | 5.00E-04 | 6.03E-02 | 0.84 |
| A_32_P89269  |          | 5.00E-04 | 6.05E-02 | 0.81 |
| A_23_P418373 | BCL2L2   | 5.00E-04 | 6.09E-02 | 0.89 |
| A_23_P170534 | FUT7     | 5.00E-04 | 6.12E-02 | 1.15 |
| A_23_P397391 | FFAR2    | 5.00E-04 | 6.12E-02 | 1.22 |
| A_23_P167168 | IGJ      | 5.00E-04 | 6.12E-02 | 1.24 |
| A_24_P83102  | IGLL1    | 6.00E-04 | 6.13E-02 | 1.26 |
| A_24_P565503 |          | 6.00E-04 | 6.19E-02 | 1.14 |
| A_32_P43664  |          | 6.00E-04 | 6.19E-02 | 1.29 |
| A_24_P409971 | NEXN     | 6.00E-04 | 6.26E-02 | 0.82 |
| A_24_P88763  | LOXL3    | 6.00E-04 | 6.28E-02 | 0.89 |
| A_23_P52451  | HKDC1    | 6.00E-04 | 6.49E-02 | 1.17 |
| A_24_P940288 | PGS1     | 6.00E-04 | 6.49E-02 | 1.18 |
| A_23_P1473   | PRF1     | 6.00E-04 | 6.52E-02 | 0.82 |
| A_24_P410453 | SYNE1    | 6.00E-04 | 6.52E-02 | 0.84 |
| A_24_P246573 | KAZ      | 6.00E-04 | 6.68E-02 | 1.31 |
| A_23_P34045  | EDA      | 6.00E-04 | 6.92E-02 | 1.13 |
| A_23_P58796  | RGMB     | 6.00E-04 | 6.92E-02 | 1.23 |
| A_23_P168828 | KLF10    | 7.00E-04 | 6.92E-02 | 0.84 |
| A_32_P140139 | F13A1    | 7.00E-04 | 6.96E-02 | 0.82 |
| A_24_P178602 | ZNF600   | 7.00E-04 | 6.96E-02 | 0.85 |
| A_23_P2661   | RAP1B    | 7.00E-04 | 6.96E-02 | 0.90 |
| A_24_P298877 | C1orf174 | 7.00E-04 | 6.96E-02 | 0.91 |
| A_24_P302406 |          | 7.00E-04 | 6.97E-02 | 0.90 |
| A_24_P76644  |          | 7.00E-04 | 7.11E-02 | 0.90 |
| A_23_P38830  | ZNF552   | 7.00E-04 | 7.12E-02 | 1.14 |
| A_23_P166306 | CBS      | 7.00E-04 | 7.17E-02 | 1.33 |
| A_23_P43107  | TM7SF4   | 7.00E-04 | 7.18E-02 | 0.80 |
| A_23_P17095  | TFPI     | 7.00E-04 | 7.54E-02 | 0.82 |
| A_23_P132226 | TPST2    | 7.00E-04 | 7.60E-02 | 0.90 |
| A_23_P218225 | QPRT     | 7.00E-04 | 7.61E-02 | 0.92 |
| A_23_P119794 |          | 8.00E-04 | 7.65E-02 | 0.86 |
| A_23_P211550 | RBX1     | 8.00E-04 | 7.65E-02 | 0.92 |
| A_23_P386241 | FAM110A  | 8.00E-04 | 7.66E-02 | 0.91 |
| A_23_P88351  | ATL1     | 8.00E-04 | 7.80E-02 | 0.88 |
| A_23_P159237 | GPR20    | 8.00E-04 | 7.86E-02 | 0.87 |
| A_24_P755069 |          | 8.00E-04 | 7.90E-02 | 0.85 |
| A_23_P13031  | CTSW     | 8.00E-04 | 8.06E-02 | 0.86 |
| A_23_P45831  | CHD1L    | 8.00E-04 | 8.06E-02 | 0.92 |
| A_23_P112957 |          | 8.00E-04 | 8.06E-02 | 1.13 |
| A_23_P100704 | MAPK7    | 8.00E-04 | 8.08E-02 | 0.92 |
| A_23_P302550 | RGS18    | 8.00E-04 | 8.09E-02 | 0.82 |
| A_23_P43679  | ZNF618   | 8.00E-04 | 8.09E-02 | 0.89 |
| A_23_P3450   | TUBGCP4  | 8.00E-04 | 8.09E-02 | 0.92 |
| A_23_P312932 | KRTAP8-1 | 8.00E-04 | 8.09E-02 | 1.20 |
| A_24_P272222 | PLIN5    | 8.00E-04 | 8.12E-02 | 1.16 |
| A_23_P209129 | LAIR2    | 8.00E-04 | 8.17E-02 | 0.73 |
| A_23_P139486 | CDK2AP1  | 8.00E-04 | 8.17E-02 | 0.89 |
| A_23_P9485   | ORM2     | 9.00E-04 | 8.30E-02 | 1.22 |
| A_23_P57413  | PPM1F    | 9.00E-04 | 8.43E-02 | 1.13 |

|              |              |          |          |      |
|--------------|--------------|----------|----------|------|
| A_23_P34915  | ATF3         | 9.00E-04 | 8.47E-02 | 0.78 |
| A_23_P428887 | KLHL34       | 9.00E-04 | 8.47E-02 | 1.12 |
| A_23_P116512 | PRR5L        | 9.00E-04 | 8.55E-02 | 0.83 |
| A_32_P140475 | KIAA1377     | 9.00E-04 | 8.66E-02 | 0.88 |
| A_23_P212779 | PARM1        | 9.00E-04 | 8.66E-02 | 1.14 |
| A_32_P172848 | GK           | 9.00E-04 | 8.66E-02 | 1.15 |
| A_32_P90615  |              | 9.00E-04 | 8.66E-02 | 1.18 |
| A_32_P54289  |              | 9.00E-04 | 8.72E-02 | 1.19 |
| A_23_P1962   | RARRES3      | 9.00E-04 | 8.74E-02 | 0.90 |
| A_32_P187009 | SERINC5      | 9.00E-04 | 8.75E-02 | 1.12 |
| A_24_P367227 | MYBL1        | 1.00E-03 | 9.03E-02 | 0.84 |
| A_23_P377267 |              | 1.00E-03 | 9.03E-02 | 0.90 |
| A_23_P66719  | DHRS13       | 1.00E-03 | 9.03E-02 | 1.14 |
| A_23_P40174  | MMP9         | 1.00E-03 | 9.03E-02 | 1.23 |
| A_32_P32195  |              | 1.00E-03 | 9.05E-02 | 0.87 |
| A_23_P217510 | CD99         | 1.00E-03 | 9.05E-02 | 0.91 |
| A_23_P148768 | F5           | 1.00E-03 | 9.05E-02 | 1.15 |
| A_24_P355693 | ACER3        | 1.00E-03 | 9.23E-02 | 0.86 |
| A_23_P101407 | C3           | 1.00E-03 | 9.24E-02 | 0.89 |
| A_23_P40548  | YPEL1        | 1.00E-03 | 9.24E-02 | 0.91 |
| A_32_P220897 |              | 1.00E-03 | 9.40E-02 | 1.11 |
| A_24_P124349 | PDGFD        | 1.10E-03 | 9.56E-02 | 0.80 |
| A_32_P28158  |              | 1.10E-03 | 9.70E-02 | 1.18 |
| A_23_P87013  | TAGLN        | 1.10E-03 | 9.71E-02 | 0.86 |
| A_32_P141768 | AGPAT4       | 1.10E-03 | 9.71E-02 | 0.88 |
| A_23_P135123 |              | 1.10E-03 | 9.77E-02 | 0.82 |
| A_24_P353638 | SLAMF7       | 1.10E-03 | 9.77E-02 | 0.87 |
| A_24_P266734 | SSH3         | 1.10E-03 | 9.77E-02 | 1.09 |
| A_23_P209625 | CYP1B1       | 1.10E-03 | 9.77E-02 | 1.19 |
| A_23_P211910 | PLOD2        | 1.10E-03 | 9.79E-02 | 0.80 |
| A_24_P9883   | DKFZp761E198 | 1.10E-03 | 9.79E-02 | 1.22 |
| A_23_P354387 | MYOF         | 1.10E-03 | 9.80E-02 | 0.85 |
| A_23_P39925  | DYSF         | 1.10E-03 | 9.80E-02 | 1.17 |
| A_23_P45917  | CKS1B        | 1.10E-03 | 9.85E-02 | 0.91 |
| A_24_P215240 | ENKUR        | 1.20E-03 | 9.85E-02 | 0.80 |
| A_23_P110791 | CSF1R        | 1.20E-03 | 9.85E-02 | 0.87 |
| A_24_P167642 | GCH1         | 1.20E-03 | 9.85E-02 | 0.88 |
| A_23_P130836 | GZMM         | 1.20E-03 | 9.85E-02 | 0.91 |
| A_24_P169843 |              | 1.20E-03 | 9.85E-02 | 1.16 |
| A_23_P43810  | LTBP1        | 1.20E-03 | 9.99E-02 | 0.79 |

Supplementary Table S2: CpG sites and associated genes differentially methylated in current smokers (FDR-corrected  $p < 0.05$ )

| CpG site   | gene     | raw p value | FDR      | $\beta$ (methylation). smokers (%) | $\beta$ (methylation). never smokers (%) | $\Delta\beta$ |
|------------|----------|-------------|----------|------------------------------------|------------------------------------------|---------------|
| cg05575921 | AHRR     | 8.1E-87     | 3.33E-81 | 53.72                              | 78.06                                    | -24.34        |
| cg21566642 |          | 1.52E-70    | 3.12E-65 | 29.85                              | 44.88                                    | -15.03        |
| cg03636183 | F2RL3    | 2.8E-67     | 3.83E-62 | 55.04                              | 65.85                                    | -10.81        |
| cg01940273 |          | 1.38E-64    | 1.42E-59 | 47.05                              | 57.5                                     | -10.45        |
| cg05951221 |          | 7.13E-60    | 5.86E-55 | 28.78                              | 39.28                                    | -10.51        |
| cg06126421 |          | 7.27E-43    | 4.27E-38 | 52.23                              | 62.46                                    | -10.23        |
| cg26703534 | AHRR     | 1.64E-37    | 8.41E-33 | 57.34                              | 62.53                                    | -5.19         |
| cg25648203 | AHRR     | 9.41E-33    | 4.3E-28  | 71.73                              | 76.3                                     | -4.57         |
| cg15342087 |          | 3.41E-32    | 1.4E-27  | 76.07                              | 79.98                                    | -3.91         |
| cg03329539 |          | 2.74E-31    | 1.02E-26 | 29.03                              | 33.44                                    | -4.40         |
| cg19859270 | GPR15    | 1.78E-28    | 6.1E-24  | 70.35                              | 74.91                                    | -4.56         |
| cg09935388 | GFI1     | 8.36E-26    | 2.64E-21 | 61.19                              | 69.18                                    | -7.98         |
| cg14753356 |          | 1E-25       | 2.94E-21 | 29.36                              | 33.25                                    | -3.90         |
| cg27537125 |          | 2.17E-25    | 5.94E-21 | 10.32                              | 11.9                                     | -1.58         |
| cg14817490 | AHRR     | 4.7E-25     | 1.21E-20 | 16.83                              | 20.93                                    | -4.10         |
| cg24859433 |          | 2.75E-23    | 6.65E-19 | 74.97                              | 78.58                                    | -3.61         |
| cg21611682 | LRP5     | 5.49E-23    | 1.25E-18 | 48.85                              | 51.86                                    | -3.01         |
| cg22132788 | MYO1G    | 9.41E-23    | 2.03E-18 | 87.8                               | 73.93                                    | 13.87         |
| cg19572487 | RARA     | 1.99E-22    | 4.1E-18  | 43.24                              | 48.25                                    | -5.01         |
| cg06644428 |          | 2.19E-22    | 4.28E-18 | 2.74                               | 4.31                                     | -1.57         |
| cg23079012 |          | 3E-22       | 5.61E-18 | 85.99                              | 94.63                                    | -8.64         |
| cg12803068 | MYO1G    | 9.56E-22    | 1.71E-17 | 74.56                              | 62.41                                    | 12.14         |
| cg23161492 | ANPEP    | 1.15E-21    | 1.97E-17 | 18.05                              | 22.5                                     | -4.45         |
| cg25949550 | CNTNAP2  | 2.78E-21    | 4.58E-17 | 7.12                               | 8.61                                     | -1.49         |
| cg23576855 | AHRR     | 4.28E-21    | 6.77E-17 | 41.15                              | 57.24                                    | -16.09        |
| cg21322436 | CNTNAP2  | 2.23E-20    | 3.39E-16 | 19                                 | 21.84                                    | -2.84         |
| cg11660018 | PRSS23   | 5.08E-20    | 7.46E-16 | 43.83                              | 47.97                                    | -4.14         |
| cg04885881 |          | 8.45E-20    | 1.2E-15  | 31.14                              | 35.38                                    | -4.23         |
| cg11902777 | AHRR     | 2.03E-19    | 2.78E-15 | 2.77                               | 3.78                                     | -1.00         |
| cg27241845 |          | 3.98E-18    | 5.28E-14 | 52.99                              | 57.14                                    | -4.15         |
| cg24996979 | C14orf43 | 1.61E-17    | 2.06E-13 | 16.8                               | 18.6                                     | -1.79         |
| cg03707168 | PPP1R15A | 2.03E-17    | 2.53E-13 | 18.9                               | 21.8                                     | -2.90         |
| cg23916896 | AHRR     | 2.11E-17    | 2.56E-13 | 13.82                              | 17.69                                    | -3.87         |
| cg11207515 | CNTNAP2  | 5.26E-17    | 6.18E-13 | 34.98                              | 30.15                                    | 4.83          |
| cg25189904 | GNG12    | 1.23E-16    | 1.4E-12  | 36.65                              | 43.32                                    | -6.67         |
| cg04551776 | AHRR     | 1E-15       | 1.11E-11 | 69.69                              | 72.48                                    | -2.79         |
| cg01692968 |          | 2.89E-15    | 3.13E-11 | 21.86                              | 24.7                                     | -2.84         |
| cg07339236 | ATP9A    | 3.11E-15    | 3.27E-11 | 7.46                               | 9.06                                     | -1.60         |
| cg23771366 | PRSS23   | 4.27E-15    | 4.39E-11 | 38.23                              | 41.6                                     | -3.37         |
| cg03450842 | ZMIZ1    | 9.29E-15    | 9.31E-11 | 54.63                              | 57.26                                    | -2.62         |
| cg16145216 | HIVEP3   | 1.34E-14    | 1.31E-10 | 29.74                              | 25.74                                    | 3.99          |
| cg17287155 | AHRR     | 1.91E-14    | 1.83E-10 | 81.7                               | 84.66                                    | -2.95         |



|            |           |          |          |       |       |        |
|------------|-----------|----------|----------|-------|-------|--------|
| cg12876356 | GFI1      | 2.09E-14 | 1.93E-10 | 65.52 | 70.94 | -5.42  |
| cg00310412 | SEMA7A    | 2.11E-14 | 1.93E-10 | 44.26 | 47.18 | -2.93  |
| cg20295214 | AVPR1B    | 4E-14    | 3.57E-10 | 60.49 | 63.71 | -3.21  |
| cg03991871 | AHRR      | 5.86E-14 | 5.12E-10 | 68    | 73.54 | -5.54  |
| cg04180046 | MYO1G     | 8.49E-14 | 7.27E-10 | 40.98 | 36.4  | 4.58   |
| cg12513616 |           | 8.74E-14 | 7.33E-10 | 38.75 | 41.32 | -2.57  |
| cg02657160 | CPOX      | 1.14E-13 | 9.4E-10  | 78.1  | 80.16 | -2.06  |
| cg00073090 |           | 1.51E-13 | 1.21E-09 | 33.42 | 35.8  | -2.37  |
| cg12806681 | AHRR      | 2E-13    | 1.58E-09 | 71.51 | 75.24 | -3.74  |
| cg15542713 | HIVEP3    | 3.16E-13 | 2.45E-09 | 44.32 | 37.95 | 6.37   |
| cg24049493 | HIVEP3    | 1.76E-12 | 1.34E-08 | 19.33 | 14.97 | 4.36   |
| cg01257799 | CXCR5     | 1.79E-12 | 1.34E-08 | 12.74 | 13.77 | -1.03  |
| cg19089201 | MYO1G     | 2.5E-12  | 1.84E-08 | 80.87 | 73.34 | 7.54   |
| cg16611234 |           | 2.66E-12 | 1.92E-08 | 23.68 | 26.75 | -3.07  |
| cg02532700 | NCF4      | 4E-12    | 2.83E-08 | 13.75 | 16.22 | -2.48  |
| cg02451831 | KIAA0087  | 4.14E-12 | 2.88E-08 | 67.21 | 69.4  | -2.19  |
| cg14624207 | LRP5      | 4.44E-12 | 3.04E-08 | 47.33 | 49.65 | -2.32  |
| cg01731783 | C14orf43  | 5.06E-12 | 3.41E-08 | 56.42 | 58.7  | -2.28  |
| cg26361535 | ZC3H3     | 7.81E-12 | 5.18E-08 | 63.94 | 67.65 | -3.71  |
| cg17619755 | VAR5      | 9.92E-12 | 6.47E-08 | 58.68 | 54.42 | 4.26   |
| cg06635952 | ANXA4     | 1.26E-11 | 8.06E-08 | 25.72 | 23.94 | 1.78   |
| cg21733098 |           | 1.32E-11 | 8.36E-08 | 56.21 | 62.27 | -6.06  |
| cg01901332 | ARRB1     | 1.35E-11 | 8.41E-08 | 60.04 | 62.99 | -2.95  |
| cg18754985 | CLDND1    | 1.38E-11 | 8.47E-08 | 85.16 | 87.16 | -2.00  |
| cg11554391 | AHRR      | 1.62E-11 | 9.8E-08  | 11.85 | 13.54 | -1.69  |
| cg23973524 | CRTC1     | 2.16E-11 | 1.29E-07 | 53.44 | 49.59 | 3.85   |
| cg15159987 | CPAMD8    | 2.71E-11 | 1.58E-07 | 55.17 | 57.55 | -2.38  |
| cg23480021 |           | 2.73E-11 | 1.58E-07 | 46.99 | 37.05 | 9.93   |
| cg18146737 | GFI1      | 3.23E-11 | 1.84E-07 | 55.74 | 71.1  | -15.36 |
| cg12075928 | PTK2      | 3.38E-11 | 1.9E-07  | 39.98 | 43.14 | -3.16  |
| cg09099830 | ITGAL     | 3.67E-11 | 2.04E-07 | 47.3  | 50.32 | -3.01  |
| cg20059012 | RARG      | 4.52E-11 | 2.48E-07 | 2.49  | 3.72  | -1.23  |
| cg06235438 | ITGAL     | 4.9E-11  | 2.65E-07 | 65.81 | 68.21 | -2.40  |
| cg10750182 | C10orf105 | 5.11E-11 | 2.69E-07 | 50.41 | 52.27 | -1.85  |
| cg18316974 | GFI1      | 5.15E-11 | 2.69E-07 | 72.33 | 81.38 | -9.05  |
| cg13751113 | AMICA1    | 5.16E-11 | 2.69E-07 | 14.29 | 15.61 | -1.32  |
| cg13039251 | PDZD2     | 5.23E-11 | 2.69E-07 | 68.79 | 64.09 | 4.70   |
| cg07826859 | MYO1G     | 6.48E-11 | 3.29E-07 | 50.64 | 52.89 | -2.25  |
| cg24090911 | AHRR      | 1.48E-10 | 7.42E-07 | 57.96 | 61.43 | -3.47  |
| cg21473814 | CRTC1     | 1.99E-10 | 9.86E-07 | 63.46 | 60.3  | 3.16   |
| cg12593793 |           | 2.16E-10 | 1.06E-06 | 22.81 | 24.49 | -1.68  |
| cg11094248 | RARA      | 2.25E-10 | 1.08E-06 | 10.64 | 11.57 | -0.93  |
| cg07202214 | LRRC32    | 2.26E-10 | 1.08E-06 | 22.68 | 24.58 | -1.90  |
| cg26271591 | NFE2L2    | 2.74E-10 | 1.28E-06 | 27.5  | 30.92 | -3.43  |
| cg08709672 | AVPR1B    | 2.75E-10 | 1.28E-06 | 53.33 | 55.98 | -2.65  |
| cg25292882 |           | 2.81E-10 | 1.3E-06  | 73.23 | 75.73 | -2.50  |
| cg25909396 | PRKCA     | 4.4E-10  | 2.01E-06 | 73.6  | 75.84 | -2.25  |
| cg20533899 | LRRC32    | 4.72E-10 | 2.13E-06 | 17.9  | 19.38 | -1.48  |
| cg03274391 |           | 5.1E-10  | 2.28E-06 | 46.53 | 38.9  | 7.63   |

|                   |           |          |          |       |       |       |
|-------------------|-----------|----------|----------|-------|-------|-------|
| cg19827923        | GPR55     | 5.77E-10 | 2.55E-06 | 73.71 | 75.44 | -1.73 |
| cg24908166        | TERT      | 6.35E-10 | 2.78E-06 | 82.6  | 85.71 | -3.12 |
| cg10874644        |           | 6.43E-10 | 2.78E-06 | 58.09 | 53.9  | 4.19  |
| cg01554474        | RAG1AP1   | 6.8E-10  | 2.91E-06 | 20.42 | 22.49 | -2.07 |
| cg21393163        |           | 7.1E-10  | 3.01E-06 | 7.72  | 9.14  | -1.43 |
| cg13193840        |           | 7.31E-10 | 3.06E-06 | 3.93  | 4.64  | -0.71 |
| ch.1.1.171672612F |           | 8.58E-10 | 3.56E-06 | 3.23  | 3.66  | -0.43 |
| cg13985437        | LRR32     | 8.8E-10  | 3.62E-06 | 22.33 | 24.27 | -1.93 |
| cg11071448        | SYT2      | 9.51E-10 | 3.87E-06 | 39.04 | 41.57 | -2.53 |
| cg16391678        | ITGAL     | 1.39E-09 | 5.61E-06 | 50.75 | 53.63 | -2.88 |
| cg16047567        | DHRS3     | 1.44E-09 | 5.73E-06 | 25.22 | 27.38 | -2.16 |
| cg01899089        | AHRR      | 1.59E-09 | 6.28E-06 | 44.79 | 47.07 | -2.28 |
| cg20886049        | TSKU      | 1.69E-09 | 6.63E-06 | 65.01 | 67.43 | -2.42 |
| cg19427338        |           | 1.73E-09 | 6.71E-06 | 73.73 | 71.1  | 2.63  |
| cg04018738        | VAR5      | 1.85E-09 | 7.1E-06  | 77.04 | 72.52 | 4.52  |
| cg05603985        | SKI       | 2.04E-09 | 7.77E-06 | 22.99 | 24.42 | -1.43 |
| cg19589396        |           | 2.07E-09 | 7.82E-06 | 55.16 | 58.07 | -2.90 |
| cg24540678        |           | 2.16E-09 | 8.07E-06 | 15.6  | 16.76 | -1.16 |
| cg13668129        | HNRNPUL1  | 2.37E-09 | 8.79E-06 | 18.85 | 19.97 | -1.12 |
| cg26963277        | KCNQ1OT1  | 3.25E-09 | 1.19E-05 | 82.42 | 85.17 | -2.75 |
| cg20244340        | SLC24A3   | 3.33E-09 | 1.21E-05 | 22.55 | 24.99 | -2.44 |
| cg19940644        |           | 3.36E-09 | 1.21E-05 | 27.21 | 30.21 | -3.00 |
| cg23351584        | PRSS23    | 3.88E-09 | 1.39E-05 | 9.46  | 10.33 | -0.86 |
| cg19713851        | ALPP      | 5.44E-09 | 1.93E-05 | 30.96 | 36.28 | -5.33 |
| cg13916835        | SMG6      | 6.04E-09 | 2.12E-05 | 63.02 | 66.12 | -3.11 |
| cg19614811        | GPR15     | 6.22E-09 | 2.16E-05 | 72.39 | 77.93 | -5.54 |
| cg26118759        | CD58      | 7.27E-09 | 2.51E-05 | 3.44  | 3.98  | -0.54 |
| cg07251887        | LOC100130 | 7.41E-09 | 2.54E-05 | 38.55 | 40.62 | -2.07 |
| cg13038618        |           | 8.01E-09 | 2.72E-05 | 44.72 | 46.77 | -2.05 |
| cg06007201        | FAM38A    | 8.29E-09 | 2.79E-05 | 5.75  | 6.5   | -0.76 |
| cg03604011        | AHRR      | 9.29E-09 | 3.10E-5  | 4.17  | 3.37  | 0.80  |
| cg09022230        | TNRC18    | 9.36E-09 | 3.10E-5  | 61.93 | 64.42 | -2.49 |
| cg21446172        | CAPN8     | 9.58E-09 | 3.15E-05 | 67.25 | 69.46 | -2.21 |
| cg08972170        | C7orf41   | 9.69E-09 | 3.16E-05 | 46.29 | 43.2  | 3.09  |
| cg26856289        | SFRS13A   | 9.81E-09 | 3.17E-05 | 23.22 | 24.75 | -1.52 |
| cg17372101        | CNTNAP2   | 1.16E-08 | 3.74E-05 | 44.87 | 42.25 | 2.62  |
| cg21188533        | CACNA1D   | 1.24E-08 | 3.96E-05 | 49.46 | 42.5  | 6.96  |
| cg15693572        |           | 1.4E-08  | 4.43E-05 | 55.14 | 49.22 | 5.92  |
| cg13633560        | LRR32     | 1.59E-08 | 4.99E-05 | 31.64 | 33.77 | -2.13 |
| cg24134897        | TSPAN4    | 1.64E-08 | 5.10E-5  | 70.6  | 64.81 | 5.79  |
| cg11557553        | AHRR      | 1.72E-08 | 5.32E-05 | 75.93 | 74.37 | 1.56  |
| cg26707709        | SNED1     | 1.78E-08 | 5.45E-05 | 10.31 | 7.76  | 2.55  |
| cg23126342        | PCDH9     | 1.85E-08 | 5.64E-05 | 45.46 | 40.89 | 4.58  |
| cg05875421        | GPR68     | 1.97E-08 | 5.96E-05 | 9.83  | 10.87 | -1.04 |
| cg10814005        | GPR68     | 2E-08    | 5.97E-05 | 9.79  | 11.09 | -1.31 |
| cg06171420        |           | 2.02E-08 | 5.97E-05 | 27.34 | 28.86 | -1.52 |
| cg24838345        | MTSS1     | 2.02E-08 | 5.97E-05 | 63.45 | 67.25 | -3.8  |
| cg13185177        | GP5       | 2.12E-08 | 6.23E-05 | 41.87 | 38.93 | 2.94  |
| cg26718213        | SNED1     | 2.24E-08 | 6.54E-05 | 23.27 | 18.44 | 4.83  |

|              |             |          |          |       |       |       |
|--------------|-------------|----------|----------|-------|-------|-------|
| cg12423733   | MAS1L       | 2.68E-08 | 7.75E-05 | 14.25 | 12.26 | 1.98  |
| cg26764244   | GNG12       | 2.82E-08 | 8.11E-05 | 14.15 | 16.27 | -2.12 |
| cg11231349   | NOS1AP      | 2.92E-08 | 8.33E-05 | 63.18 | 66.66 | -3.49 |
| cg06106428   | ARHGAP20    | 3.06E-08 | 8.68E-05 | 46.3  | 43.32 | 2.98  |
| cg09662411   | GFI1        | 3.17E-08 | 8.92E-05 | 60.31 | 63.76 | -3.44 |
| cg04517044   | SMARCD3     | 3.35E-08 | 9.34E-05 | 51.48 | 54.09 | -2.61 |
| cg05284742   | ITPK1       | 3.36E-08 | 9.34E-05 | 60.72 | 62.62 | -1.90 |
| cg13127741   | COMMD7      | 3.39E-08 | 9.35E-05 | 40.85 | 42.87 | -2.02 |
| cg08595501   | IQGAP2      | 3.88E-08 | 1.06E-04 | 55.64 | 58.65 | -3.01 |
| cg25560398   | ECCL1P2     | 3.89E-08 | 1.06E-04 | 55.99 | 57.58 | -1.59 |
| cg00336149   | CACNA1D     | 4.31E-08 | 1.16E-04 | 32.85 | 29.51 | 3.34  |
| cg07986378   | ETV6        | 4.44E-08 | 1.19E-4  | 42.21 | 45.49 | -3.29 |
| cg13500388   | CBFB        | 4.7E-08  | 1.25E-04 | 44.21 | 46.13 | -1.93 |
| cg16219322   | AHRR        | 4.7E-08  | 1.25E-04 | 77.9  | 79.16 | -1.26 |
| cg01442064   | EVC         | 4.89E-08 | 1.28E-04 | 22.4  | 23.95 | -1.55 |
| cg06648759   |             | 4.89E-08 | 1.28E-04 | 51.91 | 49.81 | 2.10  |
| cg12729894   | HCCA2(MOB2) | 5.32E-08 | 1.38E-04 | 69.74 | 71.4  | -1.66 |
| cg27467282   |             | 5.38E-08 | 1.39E-04 | 76.55 | 74.59 | 1.96  |
| cg04761231   | RPL35       | 5.53E-08 | 1.42E-04 | 23.39 | 24.6  | -1.21 |
| cg13641317   |             | 5.86E-08 | 1.49E-04 | 21.15 | 19.24 | 1.91  |
| cg07178945   | FGF23       | 5.95E-08 | 1.51E-04 | 33.05 | 30.94 | 2.11  |
| cg07151117   | DUSP4       | 6.21E-08 | 1.57E-04 | 11.58 | 12.45 | -0.87 |
| cg15022400   | TRIM69      | 6.36E-08 | 1.58E-04 | 13.76 | 15.23 | -1.47 |
| cg07465627   | STXBP4      | 6.6E-08  | 1.63E-04 | 29.02 | 30.7  | -1.68 |
| ch.1.839062R | RUNX3       | 7.01E-08 | 1.73E-04 | 4.14  | 4.66  | -0.53 |
| cg26242531   | ZFYVE21     | 7.41E-08 | 1.81E-04 | 35.97 | 34.11 | 1.85  |
| cg18660898   | CDC42SE1    | 7.54E-08 | 1.83E-04 | 7.01  | 7.9   | -0.89 |
| cg03188382   | ALPP        | 7.61E-08 | 1.84E-04 | 35.86 | 37.85 | -1.99 |
| cg14569771   |             | 7.75E-08 | 1.86E-04 | 44.42 | 42.06 | 2.36  |
| cg04368724   | VAR5        | 8.04E-08 | 1.92E-04 | 73.8  | 71.11 | 2.69  |
| cg00501876   | CSRNP1      | 8.94E-08 | 2.12E-04 | 54.5  | 56.49 | -2.00 |
| cg05302489   | VAR5        | 8.98E-08 | 2.12E-04 | 70.5  | 67.52 | 2.98  |
| cg14420519   |             | 9.12E-08 | 2.14E-04 | 71.95 | 73.43 | -1.48 |
| cg07123182   | KCNQ1OT1    | 9.21E-08 | 2.15E-04 | 80.86 | 84.22 | -3.36 |
| cg23657179   | C10orf41    | 9.38E-08 | 2.18E-04 | 38.58 | 43.29 | -4.71 |
| cg21618017   | RILPL1      | 9.55E-08 | 2.20E-04 | 5.38  | 5.83  | -0.45 |
| cg13787850   |             | 9.7E-08  | 2.23E-04 | 35.24 | 37.5  | -2.26 |
| cg10919522   | C14orf43    | 1.01E-07 | 2.31E-04 | 17.88 | 19.6  | -1.72 |
| cg16398761   | C14orf43    | 1.06E-07 | 2.42E-04 | 1.86  | 2.19  | -0.34 |
| cg25004427   | AHRR        | 1.09E-07 | 2.45E-04 | 78.74 | 76.76 | 1.99  |
| cg22403782   | ALPP        | 1.09E-07 | 2.45E-04 | 27.33 | 30.42 | -3.09 |
| cg05969150   | ZFH3        | 1.11E-07 | 2.46E-04 | 34.95 | 33.58 | 1.37  |
| cg16519923   | ITGAL       | 1.21E-07 | 2.66E-04 | 56.07 | 58.45 | -2.38 |
| cg14901243   |             | 1.21E-07 | 2.66E-04 | 30.42 | 32.46 | -2.02 |
| cg04424621   | HIST1H2BJ   | 1.24E-07 | 0.000271 | 9.38  | 10.46 | -1.08 |
| cg15638414   |             | 1.27E-07 | 0.000276 | 11.65 | 12.49 | -0.84 |
| cg05194346   |             | 1.28E-07 | 0.000277 | 49.26 | 46.27 | 3.00  |
| cg12547807   |             | 1.29E-07 | 0.000278 | 25.98 | 27.39 | -1.41 |
| cg01340312   | TUBB        | 1.3E-07  | 0.000278 | 5.19  | 5.71  | -0.52 |

|            |          |          |          |       |       |       |
|------------|----------|----------|----------|-------|-------|-------|
| cg21854952 | HIC1     | 1.33E-07 | 0.000284 | 19.95 | 18.27 | 1.68  |
| cg00485194 | ZNF385D  | 1.45E-07 | 0.000306 | 10.55 | 12.12 | -1.57 |
| cg11649376 | ACSS3    | 1.45E-07 | 0.000306 | 47.39 | 49.18 | -1.79 |
| cg02583484 | HNRNPA1  | 1.46E-07 | 0.000306 | 26.27 | 27.89 | -1.62 |
| cg02743070 | ZMIZ1    | 1.51E-07 | 0.000314 | 67.26 | 68.81 | -1.55 |
| cg15878619 | TUBB     | 1.61E-07 | 0.000334 | 6.17  | 6.74  | -0.57 |
| cg26221105 | CAPN2    | 1.62E-07 | 0.000334 | 5.64  | 6.06  | -0.43 |
| cg17924476 | AHRR     | 1.7E-07  | 0.000349 | 40.62 | 37.68 | 2.94  |
| cg00569896 |          | 1.76E-07 | 0.000359 | 49.69 | 44.36 | 5.32  |
| cg26844633 |          | 1.76E-07 | 0.000359 | 48.82 | 52.12 | -3.31 |
| cg22160883 | MATR3    | 1.79E-07 | 0.000363 | 15.15 | 16.24 | -1.08 |
| cg19713429 | CAPZB    | 2.01E-07 | 0.000404 | 18.86 | 20.56 | -1.71 |
| cg17024919 | ZNF385D  | 2.02E-07 | 0.000404 | 26.47 | 30.52 | -4.05 |
| cg11621113 | MORG1    | 2.08E-07 | 0.000416 | 25.89 | 27.27 | -1.38 |
| cg13784312 | RAPGEF1  | 2.1E-07  | 0.000417 | 3.44  | 4.01  | -0.57 |
| cg25730428 | MAS1L    | 2.14E-07 | 0.000423 | 28.32 | 26.65 | 1.67  |
| cg23677833 | AP1M1    | 2.3E-07  | 0.000451 | 8.99  | 9.89  | -0.91 |
| cg14977938 | ZFYVE21  | 2.53E-07 | 0.000496 | 66.72 | 64.51 | 2.21  |
| cg19325791 |          | 2.56E-07 | 0.000498 | 55.31 | 53.06 | 2.25  |
| cg25305703 |          | 2.63E-07 | 0.000509 | 51.74 | 55.08 | -3.34 |
| cg10420527 | LRP5     | 2.69E-07 | 0.000519 | 43.27 | 44.66 | -1.40 |
| cg11735008 | HIVEP3   | 2.72E-07 | 0.000523 | 57.45 | 53.65 | 3.80  |
| cg10788371 | LRRC32   | 2.77E-07 | 0.000529 | 48.01 | 50.19 | -2.18 |
| cg02871659 | SNHG9    | 2.8E-07  | 0.000533 | 21.51 | 24.16 | -2.66 |
| cg00210249 | HK1      | 3.13E-07 | 0.000592 | 64.36 | 61.45 | 2.91  |
| cg04945608 | TTPAL    | 3.16E-07 | 0.000597 | 64.57 | 66.42 | -1.85 |
| cg25691553 | NDUFAF3  | 3.23E-07 | 0.000605 | 3.72  | 4.16  | -0.44 |
| cg15644324 | HIVEP3   | 3.25E-07 | 0.000607 | 51.20 | 45.51 | 5.69  |
| cg24033122 | ITGAL    | 3.27E-07 | 0.000607 | 14.63 | 16.77 | -2.14 |
| cg01963224 |          | 3.46E-07 | 0.000638 | 12.27 | 13.15 | -0.89 |
| cg12873476 |          | 3.46E-07 | 0.000638 | 59.46 | 62.17 | -2.71 |
| cg22644321 | TRIB1    | 3.56E-07 | 0.000653 | 10.10 | 11.03 | -0.93 |
| cg13518625 |          | 3.61E-07 | 0.000659 | 4.95  | 5.84  | -0.89 |
| cg15417641 | CACNA1D  | 3.83E-07 | 0.000696 | 50.76 | 45.40 | 5.36  |
| cg14270346 | SHB      | 3.84E-07 | 0.000696 | 75.60 | 77.53 | -1.93 |
| cg19925780 |          | 3.92E-07 | 0.000706 | 58.97 | 55.76 | 3.21  |
| cg19089328 | NADSYN1  | 3.95E-07 | 0.000708 | 68.14 | 65.35 | 2.79  |
| cg18625627 | TSHR     | 4.03E-07 | 0.00072  | 18.07 | 16.27 | 1.79  |
| cg20716932 | COMMD7   | 4.23E-07 | 0.000749 | 27.08 | 28.71 | -1.64 |
| cg16556677 | KCNQ1OT1 | 4.25E-07 | 0.000749 | 69.81 | 71.72 | -1.90 |
| cg04641860 | HNRNPF   | 4.27E-07 | 0.00075  | 57.88 | 60.29 | -2.41 |
| cg03292675 | EPB49    | 4.35E-07 | 0.00076  | 25.22 | 27.15 | -1.94 |
| cg07525202 | RHBDL3   | 4.46E-07 | 0.000775 | 71.22 | 73.43 | -2.21 |
| cg08553327 | TNF      | 4.48E-07 | 0.000775 | 12.23 | 13.55 | -1.32 |
| cg23594345 |          | 4.49E-07 | 0.000775 | 33.91 | 37.49 | -3.58 |
| cg24563804 | ACOT7    | 4.62E-07 | 0.000792 | 15.84 | 16.78 | -0.94 |
| cg10509323 |          | 4.64E-07 | 0.000792 | 6.53  | 7.23  | -0.70 |
| cg01406381 | SLC1A5   | 4.65E-07 | 0.000792 | 4.86  | 5.53  | -0.68 |
| cg03254067 | CLNK     | 4.67E-07 | 0.000793 | 8.00  | 7.38  | 0.62  |

|            |           |          |          |       |       |       |
|------------|-----------|----------|----------|-------|-------|-------|
| cg20459687 | STK24     | 4.69E-07 | 0.000793 | 2.52  | 2.87  | -0.35 |
| cg02519286 | GAPDH     | 4.85E-07 | 0.000816 | 13.44 | 14.36 | -0.91 |
| cg23090529 |           | 4.97E-07 | 0.000834 | 28.95 | 31.61 | -2.66 |
| cg13525276 | TSHR      | 5.04E-07 | 0.000843 | 23.71 | 21.59 | 2.12  |
| cg17877600 |           | 5.16E-07 | 0.000859 | 45.08 | 46.95 | -1.87 |
| cg04716530 | ITGAL     | 5.21E-07 | 0.000863 | 70.77 | 72.92 | -2.15 |
| cg19918734 | ME3       | 5.38E-07 | 0.000886 | 9.77  | 10.53 | -0.76 |
| cg20005742 |           | 5.39E-07 | 0.000886 | 68.23 | 64.15 | 4.07  |
| cg22635676 | SNED1     | 5.59E-07 | 0.000915 | 12.95 | 7.80  | 5.15  |
| cg11197630 |           | 5.63E-07 | 0.000918 | 67.93 | 70.60 | -2.68 |
| cg19713209 | BRD2      | 5.84E-07 | 0.000949 | 1.82  | 2.04  | -0.22 |
| cg04678936 | TP53BP1   | 5.93E-07 | 0.000957 | 23.45 | 24.68 | -1.23 |
| cg06214925 | LOC641518 | 5.94E-07 | 0.000957 | 12.50 | 13.22 | -0.72 |
| cg03037030 | TNF       | 6.08E-07 | 0.000973 | 2.84  | 3.21  | -0.37 |
| cg11436113 |           | 6.08E-07 | 0.000973 | 46.90 | 48.76 | -1.86 |
| cg10062919 | RARA      | 6.12E-07 | 0.000974 | 39.72 | 41.08 | -1.36 |
| cg26729380 | TNF       | 6.21E-07 | 0.000984 | 6.95  | 7.84  | -0.89 |
| cg11645155 | SLC1A5    | 6.22E-07 | 0.000984 | 3.16  | 3.49  | -0.33 |
| cg25491122 | PCDH9     | 6.26E-07 | 0.000986 | 73.39 | 70.13 | 3.27  |
| cg04463638 | CLDN5     | 6.32E-07 | 0.000991 | 66.96 | 68.79 | -1.83 |
| cg27449150 |           | 6.37E-07 | 0.000996 | 20.17 | 21.50 | -1.32 |
| cg14179389 | GFI1      | 6.4E-07  | 0.000997 | 11.13 | 13.26 | -2.14 |
| cg05329352 | ADRA2A    | 6.49E-07 | 0.001006 | 42.86 | 46.11 | -3.25 |
| cg26099045 |           | 6.54E-07 | 0.00101  | 50.60 | 47.75 | 2.85  |
| cg22384356 | FAM83A    | 6.57E-07 | 0.001012 | 49.63 | 45.45 | 4.18  |
| cg22441770 | CRTC2     | 7.17E-07 | 0.0011   | 57.58 | 59.09 | -1.51 |
| cg03139435 | AURKA     | 7.23E-07 | 0.001105 | 15.41 | 16.68 | -1.27 |
| cg19583819 | NRG2      | 7.39E-07 | 0.001125 | 10.66 | 11.86 | -1.20 |
| cg16547579 | SLC23A2   | 7.54E-07 | 0.001143 | 13.65 | 14.88 | -1.23 |
| cg01904243 | C14orf43  | 7.7E-07  | 0.00116  | 13.50 | 14.58 | -1.09 |
| cg08331398 | PSMB8     | 7.7E-07  | 0.00116  | 68.70 | 70.49 | -1.79 |
| cg19956914 | SUMF2     | 7.87E-07 | 0.00118  | 49.69 | 46.20 | 3.49  |
| cg00871610 | MIR802    | 8.23E-07 | 0.001229 | 45.42 | 47.54 | -2.12 |
| cg10590964 |           | 8.33E-07 | 0.00124  | 57.02 | 59.33 | -2.31 |
| cg08726900 | ANKRD11   | 8.48E-07 | 0.001258 | 16.22 | 14.47 | 1.75  |
| cg03359362 | SLC1A5    | 8.64E-07 | 0.001277 | 2.87  | 3.22  | -0.35 |
| cg25512107 | RPTOR     | 8.67E-07 | 0.001277 | 96.34 | 98.01 | -1.68 |
| cg09837977 | LRRN3     | 8.89E-07 | 0.001305 | 74.31 | 75.98 | -1.67 |
| cg25748521 | HIPK2     | 9.03E-07 | 0.001321 | 68.11 | 69.72 | -1.61 |
| cg03234777 | AMICA1    | 1.00E-06 | 0.001455 | 10.47 | 11.59 | -1.12 |
| cg14989202 | C1orf200  | 1.00E-06 | 0.001455 | 10.81 | 11.85 | -1.04 |
| cg08871244 | FAM38A    | 1.02E-06 | 0.001482 | 8.04  | 8.97  | -0.92 |
| cg16290996 | GAS5      | 1.03E-06 | 0.001487 | 18.23 | 19.74 | -1.51 |
| cg00925244 |           | 1.04E-06 | 0.001488 | 82.05 | 83.41 | -1.36 |
| cg11066209 | FTSJ2     | 1.04E-06 | 0.001488 | 13.86 | 14.83 | -0.97 |
| cg04517079 | FOXP4     | 1.05E-06 | 0.0015   | 56.32 | 58.26 | -1.95 |
| cg01207684 | ADCY9     | 1.06E-06 | 0.0015   | 61.60 | 65.46 | -3.87 |
| cg23667432 | ALPP      | 1.06E-06 | 0.0015   | 60.14 | 61.66 | -1.52 |
| cg26572392 | KIAA1217  | 1.07E-06 | 0.001515 | 46.74 | 44.52 | 2.22  |

|            |           |          |          |       |       |       |
|------------|-----------|----------|----------|-------|-------|-------|
| cg00024404 | SERINC5   | 1.08E-06 | 0.001515 | 8.01  | 8.86  | -0.84 |
| cg19254163 | GPR44     | 1.09E-06 | 0.001524 | 54.03 | 55.75 | -1.71 |
| cg12147622 |           | 1.11E-06 | 0.001546 | 44.32 | 46.37 | -2.05 |
| cg07166409 | SEMA4C    | 1.15E-06 | 0.001604 | 3.99  | 4.39  | -0.40 |
| cg02730804 | GRAMD3    | 1.16E-06 | 0.001606 | 66.91 | 65.14 | 1.77  |
| cg02228160 | HMHB1     | 1.17E-06 | 0.001615 | 27.72 | 25.95 | 1.77  |
| cg06442294 |           | 1.17E-06 | 0.001615 | 11.06 | 12.05 | -0.99 |
| cg18405341 | ATF4      | 1.17E-06 | 0.001615 | 46.41 | 47.86 | -1.45 |
| cg07180646 | TMEM51    | 1.2E-06  | 0.001638 | 46.98 | 49.62 | -2.64 |
| cg01432620 | ZIC2      | 1.23E-06 | 0.00167  | 7.78  | 8.43  | -0.65 |
| cg14093127 |           | 1.23E-06 | 0.00167  | 70.11 | 73.00 | -2.90 |
| cg23327334 | GRK6      | 1.23E-06 | 0.00167  | 21.23 | 22.11 | -0.88 |
| cg13976502 | C14orf43  | 1.27E-06 | 0.001711 | 42.16 | 43.78 | -1.62 |
| cg18450254 | PRICKLE2  | 1.29E-06 | 0.001736 | 24.94 | 23.12 | 1.81  |
| cg21140898 |           | 1.32E-06 | 0.001773 | 24.30 | 27.01 | -2.70 |
| cg04793090 | CNBP      | 1.34E-06 | 0.001793 | 9.95  | 10.54 | -0.58 |
| cg01435643 | MCF2L     | 1.35E-06 | 0.001793 | 43.11 | 39.68 | 3.43  |
| cg25537245 |           | 1.35E-06 | 0.001793 | 8.72  | 9.36  | -0.65 |
| cg10389771 | BCAN      | 1.39E-06 | 0.001845 | 28.30 | 30.13 | -1.84 |
| cg24420089 | PTDSS2    | 1.4E-06  | 0.001853 | 35.36 | 33.47 | 1.89  |
| cg11185549 | MAP1LC3B2 | 1.41E-06 | 0.001853 | 9.76  | 10.59 | -0.83 |
| cg15187398 | MOBK2A    | 1.42E-06 | 0.001867 | 34.31 | 36.36 | -2.05 |
| cg13488013 |           | 1.44E-06 | 0.001883 | 22.36 | 23.58 | -1.22 |
| cg03785076 | SNED1     | 1.46E-06 | 0.001899 | 59.41 | 60.97 | -1.57 |
| cg12165685 | SLC1A5    | 1.46E-06 | 0.001899 | 4.53  | 5.12  | -0.59 |
| cg10843276 | PCGF3     | 1.47E-06 | 0.0019   | 52.08 | 48.84 | 3.24  |
| cg18642234 | GPX1      | 1.54E-06 | 0.001979 | 43.91 | 45.42 | -1.51 |
| cg14120703 | NOTCH1    | 1.56E-06 | 0.00201  | 49.86 | 51.22 | -1.36 |
| cg21878650 | ADAMTS6   | 1.57E-06 | 0.002013 | 13.96 | 12.14 | 1.82  |
| cg20751345 |           | 1.61E-06 | 0.00206  | 63.59 | 61.56 | 2.03  |
| cg02637282 |           | 1.64E-06 | 0.002084 | 15.20 | 13.72 | 1.48  |
| cg23230929 |           | 1.65E-06 | 0.002091 | 38.79 | 37.25 | 1.53  |
| cg14675361 | LMO7      | 1.66E-06 | 0.002097 | 17.75 | 16.11 | 1.64  |
| cg14796406 | SEMA3C    | 1.68E-06 | 0.002114 | 14.09 | 16.40 | -2.32 |
| cg26132737 | ANKRD44   | 1.69E-06 | 0.00212  | 58.60 | 61.89 | -3.30 |
| cg01594685 | IL32      | 1.73E-06 | 0.002156 | 69.02 | 70.78 | -1.76 |
| cg06819357 | TECPR2    | 1.73E-06 | 0.002156 | 61.23 | 58.95 | 2.27  |
| cg19719391 |           | 1.73E-06 | 0.002156 | 53.66 | 51.82 | 1.84  |
| cg17412005 | MUTYH     | 1.74E-06 | 0.002163 | 18.30 | 19.50 | -1.21 |
| cg14165660 |           | 1.79E-06 | 0.002212 | 70.10 | 68.37 | 1.73  |
| cg01208318 |           | 1.81E-06 | 0.002235 | 30.69 | 33.71 | -3.02 |
| cg19783015 |           | 1.83E-06 | 0.002246 | 12.75 | 13.36 | -0.61 |
| cg14580211 | C5orf62   | 1.84E-06 | 0.002262 | 61.78 | 63.85 | -2.07 |
| cg15937073 | HIVEP3    | 1.86E-06 | 0.002278 | 27.34 | 24.38 | 2.96  |
| cg21756476 | RORA      | 1.89E-06 | 0.002301 | 49.43 | 47.33 | 2.10  |
| cg26140475 |           | 1.91E-06 | 0.002319 | 14.78 | 15.89 | -1.11 |
| cg26529655 | AHRR      | 1.95E-06 | 0.002362 | 64.69 | 66.35 | -1.66 |
| cg01763916 | SMAP2     | 1.99E-06 | 0.002404 | 29.88 | 31.42 | -1.54 |
| cg05339037 |           | 2.04E-06 | 0.002455 | 41.67 | 43.15 | -1.48 |

|            |           |          |          |       |       |       |
|------------|-----------|----------|----------|-------|-------|-------|
| cg01127300 |           | 2.07E-06 | 0.002487 | 43.98 | 46.59 | -2.61 |
| cg00202479 | VAR5      | 2.1E-06  | 0.002522 | 76.75 | 75.10 | 1.65  |
| cg04387396 | SGPL1     | 2.22E-06 | 0.002649 | 2.66  | 2.96  | -0.30 |
| cg21766592 | SLC1A5    | 2.26E-06 | 0.002689 | 6.29  | 7.12  | -0.83 |
| cg15874302 |           | 2.27E-06 | 0.002692 | 14.54 | 15.43 | -0.89 |
| cg07090714 |           | 2.31E-06 | 0.002737 | 27.51 | 29.36 | -1.85 |
| cg17953136 | LAPTM4A   | 2.32E-06 | 0.002737 | 46.69 | 44.77 | 1.92  |
| cg23110422 | ETS2      | 2.36E-06 | 0.002779 | 67.83 | 70.50 | -2.66 |
| cg01882991 |           | 2.44E-06 | 0.002862 | 52.23 | 54.03 | -1.80 |
| cg17025683 | SNORD78   | 2.45E-06 | 0.002871 | 10.43 | 11.57 | -1.13 |
| cg27004870 | FAM38A    | 2.51E-06 | 0.002929 | 8.49  | 9.27  | -0.78 |
| cg04956244 | RARA      | 2.54E-06 | 0.002956 | 59.50 | 58.21 | 1.29  |
| cg27527798 | ELFN1     | 2.56E-06 | 0.002974 | 65.62 | 67.87 | -2.25 |
| cg10482632 | CSRP1     | 2.57E-06 | 0.002974 | 6.51  | 7.09  | -0.57 |
| cg25037384 | OTX1      | 2.58E-06 | 0.002974 | 5.60  | 6.24  | -0.65 |
| cg23781467 | VAR5      | 2.63E-06 | 0.003031 | 57.24 | 55.49 | 1.75  |
| cg07052041 |           | 2.69E-06 | 0.003094 | 7.17  | 7.84  | -0.66 |
| cg16254309 | CNTNAP2   | 2.72E-06 | 0.003111 | 8.49  | 9.31  | -0.82 |
| cg00668559 | NFKBIE    | 2.74E-06 | 0.003117 | 10.10 | 11.22 | -1.12 |
| cg02610360 | TMEM136   | 2.75E-06 | 0.003117 | 36.00 | 33.07 | 2.93  |
| cg18396403 | TMEM184B  | 2.76E-06 | 0.003117 | 18.00 | 18.96 | -0.95 |
| cg23348010 | SLCSA10   | 2.76E-06 | 0.003117 | 47.94 | 49.67 | -1.73 |
| cg22544881 | FLJ43663  | 2.78E-06 | 0.003126 | 19.68 | 20.79 | -1.12 |
| cg19825437 |           | 2.81E-06 | 0.003153 | 67.52 | 69.22 | -1.70 |
| cg10581837 | LMO7      | 2.83E-06 | 0.003167 | 30.06 | 28.42 | 1.64  |
| cg13049261 | SETD3     | 2.84E-06 | 0.003173 | 74.13 | 75.59 | -1.46 |
| cg14208102 | TREX1     | 2.87E-06 | 0.003194 | 11.26 | 12.01 | -0.75 |
| cg03355101 |           | 2.9E-06  | 0.003212 | 4.17  | 4.61  | -0.44 |
| cg09701700 | MIR146B   | 2.91E-06 | 0.003212 | 30.40 | 32.32 | -1.92 |
| cg19838043 | ZFYVE21   | 2.91E-06 | 0.003212 | 57.66 | 55.50 | 2.15  |
| cg16408970 | BAMBI     | 2.92E-06 | 0.003214 | 7.77  | 8.42  | -0.65 |
| cg08335767 | HMGA1     | 2.94E-06 | 0.003232 | 12.77 | 13.64 | -0.87 |
| cg25913882 | CUBN      | 2.96E-06 | 0.003246 | 69.02 | 70.66 | -1.64 |
| cg24556382 | GALNT7    | 3.04E-06 | 0.00332  | 60.51 | 63.39 | -2.88 |
| cg03699074 | FAM38A    | 3.05E-06 | 0.003321 | 13.54 | 14.82 | -1.28 |
| cg08483768 |           | 3.05E-06 | 0.00332  | 44.75 | 40.18 | 4.57  |
| cg11978634 | ENOX1     | 3.12E-06 | 0.003381 | 68.73 | 66.41 | 2.32  |
| cg06946797 |           | 3.17E-06 | 0.003428 | 17.59 | 19.22 | -1.63 |
| cg24851181 | C3orf72   | 3.22E-06 | 0.003467 | 15.49 | 16.61 | -1.11 |
| cg00690082 | STAT5A    | 3.23E-06 | 0.003467 | 23.87 | 24.79 | -0.92 |
| cg12877056 | HDAC4     | 3.23E-06 | 0.003467 | 80.02 | 81.62 | -1.60 |
| cg00116430 |           | 3.29E-06 | 0.003525 | 44.96 | 47.39 | -2.44 |
| cg06595162 | NCRNA0011 | 3.36E-06 | 0.003589 | 67.38 | 68.91 | -1.53 |
| cg23621097 | HIC1      | 3.41E-06 | 0.003629 | 9.31  | 7.99  | 1.32  |
| cg15636519 | STAT4     | 3.43E-06 | 0.003633 | 8.13  | 9.08  | -0.95 |
| cg26898567 | TMEM220   | 3.43E-06 | 0.003633 | 68.53 | 70.38 | -1.86 |
| cg00464814 | ATXN1     | 3.46E-06 | 0.003659 | 13.66 | 14.61 | -0.94 |
| cg13937905 | RARG      | 3.48E-06 | 0.003667 | 82.21 | 85.12 | -2.90 |
| cg07285983 | RABGAP1L  | 3.49E-06 | 0.003668 | 75.73 | 73.27 | 2.46  |

|            |          |          |          |       |       |       |
|------------|----------|----------|----------|-------|-------|-------|
| cg02793162 | CORO2B   | 3.51E-06 | 0.003668 | 38.02 | 36.37 | 1.65  |
| cg16969872 | RBM26    | 3.51E-06 | 0.003668 | 61.35 | 63.63 | -2.27 |
| cg15482893 | BSDC1    | 3.52E-06 | 0.003668 | 21.33 | 20.00 | 1.34  |
| cg23480341 | SLPI     | 3.56E-06 | 0.003707 | 6.69  | 7.52  | -0.83 |
| cg14897188 | RNASEK   | 3.59E-06 | 0.003725 | 59.03 | 60.60 | -1.57 |
| cg01538731 | KLHDC4   | 3.6E-06  | 0.003725 | 59.14 | 54.63 | 4.51  |
| cg16771652 | NOD2     | 3.65E-06 | 0.003769 | 19.14 | 20.16 | -1.02 |
| cg23279756 |          | 3.66E-06 | 0.003769 | 16.03 | 14.66 | 1.36  |
| cg02767093 | STK24    | 3.71E-06 | 0.003808 | 24.42 | 25.42 | -0.99 |
| cg02254407 | PLEKHB1  | 3.73E-06 | 0.003825 | 77.52 | 79.62 | -2.09 |
| cg15331996 | SPOCK2   | 3.74E-06 | 0.003825 | 23.36 | 24.56 | -1.20 |
| cg05830220 | KLHDC4   | 3.81E-06 | 0.00388  | 70.97 | 67.28 | 3.69  |
| cg15380836 | RILP     | 3.81E-06 | 0.00388  | 9.50  | 10.09 | -0.59 |
| cg26128192 |          | 3.86E-06 | 0.003919 | 12.05 | 12.86 | -0.80 |
| cg05438378 | SMAD3    | 3.95E-06 | 0.003994 | 18.86 | 20.67 | -1.81 |
| cg03935116 | FAM60A   | 4.00E-06 | 0.004034 | 11.24 | 12.13 | -0.89 |
| cg10717214 | TNF      | 4.06E-06 | 0.004089 | 7.71  | 8.42  | -0.71 |
| cg05661533 | LPCAT1   | 4.11E-06 | 0.00412  | 30.53 | 32.21 | -1.68 |
| cg18966401 | ELF3     | 4.11E-06 | 0.00412  | 59.98 | 61.53 | -1.55 |
| cg08822075 | NFE2L3   | 4.22E-06 | 0.004217 | 14.04 | 16.32 | -2.28 |
| cg03474926 | RALGDS   | 4.29E-06 | 0.004269 | 31.04 | 32.13 | -1.09 |
| cg26937798 | IL4R     | 4.3E-06  | 0.004269 | 2.72  | 3.10  | -0.38 |
| cg02385153 | AHRR     | 4.31E-06 | 0.004269 | 79.44 | 77.76 | 1.67  |
| cg11412468 |          | 4.31E-06 | 0.004269 | 45.93 | 44.03 | 1.90  |
| cg21913886 | TMEM51   | 4.32E-06 | 0.004269 | 69.23 | 71.68 | -2.45 |
| cg15519474 | PRKCA    | 4.45E-06 | 0.004382 | 81.46 | 82.94 | -1.48 |
| cg03440944 | C7orf40  | 4.48E-06 | 0.004397 | 61.04 | 62.76 | -1.72 |
| cg06216408 |          | 4.48E-06 | 0.004397 | 25.76 | 26.98 | -1.23 |
| cg21222743 | TNF      | 4.51E-06 | 0.004418 | 5.51  | 6.16  | -0.65 |
| cg20698421 | SLC1A4   | 4.56E-06 | 0.00444  | 35.98 | 39.94 | -3.96 |
| cg25607920 | HIVEP3   | 4.56E-06 | 0.00444  | 34.48 | 28.97 | 5.52  |
| cg15975802 | PTPN6    | 4.59E-06 | 0.004455 | 17.28 | 18.09 | -0.81 |
| cg02832697 | TRIM2    | 4.66E-06 | 0.004506 | 35.76 | 37.39 | -1.64 |
| cg03630015 | WNT10A   | 4.66E-06 | 0.004506 | 66.97 | 69.00 | -2.03 |
| cg10951873 | RUNX3    | 4.7E-06  | 0.004531 | 5.97  | 6.50  | -0.53 |
| cg00498211 | SLC1A4   | 4.77E-06 | 0.004593 | 18.25 | 20.77 | -2.52 |
| cg19903071 | BAZ2B    | 4.85E-06 | 0.004631 | 21.14 | 19.79 | 1.35  |
| cg14550518 | ZNF385D  | 4.86E-06 | 0.004631 | 3.75  | 4.41  | -0.66 |
| cg17098415 |          | 4.86E-06 | 0.004631 | 2.04  | 2.28  | -0.23 |
| cg17320698 | MPPED2   | 4.88E-06 | 0.00464  | 55.18 | 57.43 | -2.25 |
| cg24230340 | HTRA2    | 4.92E-06 | 0.004666 | 12.24 | 13.53 | -1.29 |
| cg26305174 | SLC12A9  | 4.93E-06 | 0.004666 | 36.72 | 34.78 | 1.93  |
| cg20700731 | EDN2     | 4.94E-06 | 0.004669 | 48.67 | 50.08 | -1.41 |
| cg00942495 | FBXO22   | 4.96E-06 | 0.004673 | 86.35 | 84.06 | 2.29  |
| cg15428620 | SFXN3    | 5.04E-06 | 0.004736 | 31.11 | 32.24 | -1.13 |
| cg25446789 | DTNB     | 5.11E-06 | 0.004797 | 41.12 | 42.92 | -1.81 |
| cg04231319 | MLLT10   | 5.19E-06 | 0.004856 | 23.23 | 24.30 | -1.07 |
| cg19514721 |          | 5.28E-06 | 0.004933 | 56.63 | 54.69 | 1.94  |
| cg26356892 | SLC25A17 | 5.36E-06 | 0.004981 | 3.11  | 2.50  | 0.61  |



|            |          |          |          |       |       |       |
|------------|----------|----------|----------|-------|-------|-------|
| cg03345925 | ZC3H3    | 5.42E-06 | 0.005032 | 65.50 | 63.62 | 1.88  |
| cg00640314 | SNORD87  | 5.49E-06 | 0.005064 | 63.85 | 65.98 | -2.13 |
| cg14012925 | CUX1     | 5.5E-06  | 0.005064 | 37.52 | 35.33 | 2.18  |
| cg06830167 | CAMTA1   | 5.54E-06 | 0.005097 | 15.97 | 17.15 | -1.18 |
| cg25686812 | SEC22C   | 5.59E-06 | 0.005126 | 6.35  | 6.92  | -0.57 |
| cg26343958 |          | 5.63E-06 | 0.00515  | 17.66 | 19.19 | -1.52 |
| cg22383924 | TP73     | 5.74E-06 | 0.005247 | 51.56 | 53.24 | -1.68 |
| cg15058210 | HDAC4    | 5.83E-06 | 0.005311 | 10.81 | 11.94 | -1.13 |
| cg00741986 | TNIP2    | 5.94E-06 | 0.005394 | 46.20 | 47.85 | -1.65 |
| cg14011327 |          | 5.94E-06 | 0.005394 | 8.13  | 8.82  | -0.69 |
| cg24389054 | HOXA7    | 5.98E-06 | 0.005411 | 68.67 | 70.93 | -2.26 |
| cg05267427 | ZNF827   | 6.05E-06 | 0.005468 | 80.54 | 76.69 | 3.85  |
| cg02917867 |          | 6.12E-06 | 0.005518 | 28.72 | 30.03 | -1.32 |
| cg16178855 | PMEPA1   | 6.17E-06 | 0.005539 | 72.88 | 71.53 | 1.34  |
| cg21436456 | ZNF385D  | 6.17E-06 | 0.005539 | 5.38  | 6.16  | -0.79 |
| cg00911794 | HIC1     | 6.22E-06 | 0.005571 | 13.88 | 12.25 | 1.62  |
| cg17001464 | FLJ43663 | 6.24E-06 | 0.005571 | 79.49 | 80.84 | -1.34 |
| cg25223634 | C10orf26 | 6.25E-06 | 0.005576 | 36.40 | 38.50 | -2.10 |
| cg10717312 | SNED1    | 6.42E-06 | 0.005715 | 44.61 | 41.18 | 3.43  |
| cg15903282 | EPHB1    | 6.46E-06 | 0.005721 | 68.61 | 70.43 | -1.82 |
| cg26669717 | PRKAR1B  | 6.46E-06 | 0.005721 | 50.71 | 52.28 | -1.57 |
| cg08384239 | TANC1    | 6.58E-06 | 0.005816 | 33.98 | 32.67 | 1.31  |
| cg26057969 | TPRA1    | 6.61E-06 | 0.005829 | 15.26 | 16.01 | -0.75 |
| cg22998476 |          | 6.67E-06 | 0.005874 | 25.62 | 27.01 | -1.40 |
| cg25607249 | SLC1A5   | 6.7E-06  | 0.005882 | 6.85  | 7.57  | -0.72 |
| cg26077378 | ZNF385D  | 6.77E-06 | 0.005929 | 11.60 | 13.32 | -1.72 |
| cg12611488 | SKI      | 6.79E-06 | 0.005934 | 80.77 | 77.61 | 3.16  |
| cg16509061 | TERT     | 6.83E-06 | 0.00596  | 78.84 | 79.98 | -1.14 |
| cg26542660 | CEP135   | 7.09E-06 | 0.00617  | 11.87 | 12.65 | -0.79 |
| cg26504421 | SDK2     | 7.13E-06 | 0.006195 | 48.49 | 53.81 | -5.33 |
| cg05593667 |          | 7.2E-06  | 0.006218 | 14.78 | 16.09 | -1.31 |
| cg14064762 | TRAF1    | 7.2E-06  | 0.006218 | 9.66  | 10.57 | -0.90 |
| cg15471946 | BRWD1    | 7.2E-06  | 0.006218 | 5.41  | 5.89  | -0.48 |
| cg20267775 |          | 7.25E-06 | 0.006251 | 75.22 | 76.43 | -1.22 |
| cg20187173 |          | 7.29E-06 | 0.006268 | 75.67 | 73.73 | 1.94  |
| cg23222488 |          | 7.33E-06 | 0.006288 | 63.75 | 61.32 | 2.42  |
| cg05655806 | CD96     | 7.42E-06 | 0.006342 | 38.28 | 41.06 | -2.78 |
| cg05616472 | EHMT1    | 7.43E-06 | 0.006342 | 11.11 | 11.79 | -0.68 |
| cg01873977 | MTSS1    | 7.44E-06 | 0.006342 | 59.33 | 61.69 | -2.36 |
| cg11229399 |          | 7.49E-06 | 0.006374 | 8.13  | 7.30  | 0.83  |
| cg13238479 | MAB21L1  | 7.53E-06 | 0.006393 | 28.59 | 30.11 | -1.52 |
| cg16736826 | EDN2     | 7.6E-06  | 0.006439 | 33.20 | 34.44 | -1.24 |
| cg11556164 | LRRN3    | 7.61E-06 | 0.006439 | 64.27 | 66.86 | -2.59 |
| cg19593285 | E2F1     | 7.76E-06 | 0.006551 | 63.25 | 65.94 | -2.69 |
| cg20465954 | SOAT2    | 7.8E-06  | 0.006572 | 3.74  | 4.09  | -0.35 |
| cg02736908 |          | 7.88E-06 | 0.006621 | 58.15 | 61.01 | -2.85 |
| cg04942107 |          | 7.92E-06 | 0.006643 | 69.95 | 71.40 | -1.44 |
| cg20309891 | MEOX1    | 7.95E-06 | 0.006651 | 58.22 | 59.64 | -1.42 |
| cg09496748 | ANKRD44  | 8.03E-06 | 0.006704 | 72.52 | 74.68 | -2.16 |

|                |           |          |          |       |       |       |
|----------------|-----------|----------|----------|-------|-------|-------|
| cg07500325     |           | 8.05E-06 | 0.006709 | 44.70 | 47.36 | -2.66 |
| cg19197419     | UBE2C     | 8.1E-06  | 0.006742 | 11.44 | 12.60 | -1.16 |
| cg05901447     | SLC34A1   | 8.13E-06 | 0.006748 | 76.17 | 77.29 | -1.12 |
| cg18325389     |           | 8.15E-06 | 0.006756 | 24.71 | 26.17 | -1.46 |
| cg26170244     |           | 8.37E-06 | 0.00692  | 16.24 | 17.39 | -1.16 |
| cg17318719     | TMPRSS4   | 8.45E-06 | 0.006972 | 29.05 | 30.16 | -1.11 |
| cg22417733     | FBXO5     | 8.57E-06 | 0.007062 | 15.12 | 16.75 | -1.63 |
| cg13608545     |           | 8.72E-06 | 0.007153 | 55.23 | 57.41 | -2.19 |
| cg16134718     |           | 8.72E-06 | 0.007153 | 65.61 | 67.14 | -1.53 |
| cg05222243     | COL13A1   | 8.74E-06 | 0.007153 | 70.98 | 72.29 | -1.31 |
| cg21746120     | LRP5      | 8.88E-06 | 0.007253 | 33.70 | 34.72 | -1.03 |
| cg01617071     | ADAP1     | 8.9E-06  | 0.00726  | 46.59 | 49.12 | -2.53 |
| cg08738403     | AHCYL2    | 9.00E-06 | 0.007324 | 4.19  | 4.58  | -0.39 |
| cg15963913     | ZFYVE21   | 9.03E-06 | 0.007331 | 67.23 | 65.35 | 1.88  |
| cg03433699     | RNASEK    | 9.25E-06 | 0.007481 | 5.35  | 5.79  | -0.44 |
| cg19372602     |           | 9.47E-06 | 0.007646 | 33.96 | 35.84 | -1.88 |
| cg21552014     |           | 9.51E-06 | 0.007662 | 68.16 | 66.25 | 1.91  |
| cg25838968     | PLXNA2    | 9.55E-06 | 0.007676 | 44.71 | 46.52 | -1.81 |
| cg26276120     | TPI1      | 9.56E-06 | 0.007676 | 15.53 | 16.63 | -1.11 |
| cg16744741     | PRKG2     | 9.62E-06 | 0.007708 | 33.63 | 31.96 | 1.67  |
| cg04137490     | DOCK5     | 9.8E-06  | 0.007835 | 82.87 | 79.53 | 3.34  |
| cg06500714     | VENTX     | 9.98E-06 | 0.007961 | 1.56  | 1.30  | 0.26  |
| cg19057830     | C10orf41  | 0.00001  | 0.007981 | 58.86 | 61.59 | -2.73 |
| cg05673882     | POLK      | 1.01E-05 | 0.008008 | 23.34 | 25.01 | -1.66 |
| cg25421530     | SORBS1    | 1.01E-05 | 0.008016 | 74.47 | 72.35 | 2.11  |
| cg26891494     | ZNF365    | 1.01E-05 | 0.008011 | 79.59 | 77.46 | 2.14  |
| cg03641640     | RASA3     | 1.02E-05 | 0.008016 | 84.83 | 86.80 | -1.97 |
| cg10179300     | TRIO      | 1.02E-05 | 0.008016 | 75.11 | 76.95 | -1.84 |
| cg16201146     |           | 1.02E-05 | 0.008016 | 63.49 | 65.13 | -1.64 |
| cg25799109     | ARHGEF3   | 1.02E-05 | 0.008016 | 26.75 | 28.80 | -2.05 |
| ch.5.67026991F |           | 1.04E-05 | 0.008151 | 1.51  | 1.25  | 0.26  |
| cg15743533     | FAM110A   | 1.06E-05 | 0.008283 | 11.28 | 12.13 | -0.85 |
| cg22437284     | SRC       | 1.06E-05 | 0.008283 | 78.00 | 76.72 | 1.29  |
| cg25420507     | LGALS7    | 1.06E-05 | 0.008283 | 15.65 | 17.00 | -1.35 |
| cg01118348     |           | 1.07E-05 | 0.008298 | 59.36 | 60.74 | -1.38 |
| cg15775914     | CHML      | 1.07E-05 | 0.008298 | 56.32 | 54.48 | 1.84  |
| cg00687135     | ZNF385D   | 1.08E-05 | 0.00836  | 36.34 | 39.05 | -2.71 |
| cg14920061     |           | 1.09E-05 | 0.008457 | 11.22 | 12.10 | -0.88 |
| cg09109520     | GPR56     | 1.10E-05 | 0.008508 | 26.87 | 25.21 | 1.66  |
| cg11693709     | PAK6      | 1.10E-05 | 0.008482 | 36.59 | 34.55 | 2.04  |
| cg13832372     | LHX6      | 1.11E-05 | 0.008514 | 10.38 | 12.22 | -1.84 |
| cg15108334     | RPS12     | 1.12E-05 | 0.008617 | 64.81 | 66.50 | -1.69 |
| cg15474579     | CDKN1A    | 1.16E-05 | 0.008923 | 51.21 | 53.03 | -1.82 |
| cg25013095     |           | 1.18E-05 | 0.009014 | 86.66 | 88.89 | -2.23 |
| cg03253303     | RAB11FIP4 | 1.19E-05 | 0.00908  | 55.63 | 57.43 | -1.80 |
| cg00816037     | FAM38A    | 1.20E-05 | 0.009125 | 7.00  | 7.97  | -0.97 |
| cg26878655     | RARA      | 1.20E-05 | 0.009163 | 65.34 | 66.94 | -1.60 |
| cg16983588     | PRDM10    | 1.21E-05 | 0.009229 | 43.00 | 40.46 | 2.53  |
| cg03814093     | KIAA0922  | 1.22E-05 | 0.00923  | 12.24 | 13.80 | -1.56 |

|            |          |          |          |       |       |       |
|------------|----------|----------|----------|-------|-------|-------|
| cg13184736 | GNG12    | 1.24E-05 | 0.009376 | 26.41 | 29.78 | -3.37 |
| cg22188918 | CLDN15   | 1.24E-05 | 0.009352 | 52.79 | 50.52 | 2.27  |
| cg24688690 | AHRR     | 1.24E-05 | 0.009376 | 60.17 | 61.56 | -1.39 |
| cg07068045 |          | 1.25E-05 | 0.00939  | 72.07 | 75.36 | -3.29 |
| cg16903811 |          | 1.25E-05 | 0.009408 | 16.10 | 17.22 | -1.12 |
| cg07993586 | DNAJB6   | 1.26E-05 | 0.009455 | 69.07 | 70.69 | -1.61 |
| cg17417856 | PRMT1    | 1.26E-05 | 0.009463 | 54.63 | 56.45 | -1.82 |
| cg02639359 | FCHO1    | 1.29E-05 | 0.009597 | 29.13 | 30.79 | -1.67 |
| cg06298346 | ANKRD33B | 1.29E-05 | 0.009597 | 16.52 | 17.54 | -1.02 |
| cg17823346 | ZMIZ1    | 1.29E-05 | 0.009597 | 41.49 | 43.33 | -1.83 |
| cg01651915 |          | 1.30E-05 | 0.009642 | 22.03 | 24.45 | -2.41 |
| cg20134287 | AUTS2    | 1.30E-05 | 0.009652 | 13.25 | 14.49 | -1.24 |
| cg23637791 | ODF3L1   | 1.30E-05 | 0.009642 | 13.22 | 14.00 | -0.77 |
| cg13583535 | MBP      | 1.35E-05 | 0.009988 | 9.60  | 10.29 | -0.70 |
| cg13591783 | ANXA1    | 1.36E-05 | 0.010007 | 11.85 | 12.72 | -0.87 |
| cg14371731 | ZMIZ1    | 1.36E-05 | 0.010007 | 2.24  | 1.38  | 0.86  |
| cg16783186 |          | 1.36E-05 | 0.010007 | 37.30 | 35.17 | 2.13  |
| cg01979157 | SKI      | 1.37E-05 | 0.010035 | 4.84  | 5.39  | -0.55 |
| cg10920316 |          | 1.37E-05 | 0.010028 | 7.36  | 8.00  | -0.64 |
| cg05713794 | GP5      | 1.38E-05 | 0.010107 | 81.29 | 79.80 | 1.48  |
| cg09338136 | AHRR     | 1.39E-05 | 0.010175 | 17.48 | 18.76 | -1.28 |
| cg04970434 | GP1BA    | 0.000014 | 0.010232 | 65.68 | 64.03 | 1.64  |
| cg00449189 |          | 1.41E-05 | 0.010285 | 11.02 | 11.85 | -0.83 |
| cg11555067 | INPP4A   | 1.46E-05 | 0.010612 | 23.71 | 25.10 | -1.39 |
| cg00917251 | RCAN3    | 1.47E-05 | 0.010624 | 10.35 | 11.14 | -0.79 |
| cg17250929 | S100A5   | 1.47E-05 | 0.010624 | 42.89 | 41.38 | 1.52  |
| cg07452776 | GPR68    | 1.49E-05 | 0.010726 | 6.98  | 7.38  | -0.39 |
| cg10650821 | TNF      | 1.49E-05 | 0.010732 | 8.36  | 8.98  | -0.62 |
| cg07485775 | NEURL1B  | 0.000015 | 0.010774 | 68.40 | 70.81 | -2.41 |
| cg21345826 | APOBEC3A | 0.000015 | 0.010774 | 75.84 | 74.50 | 1.34  |
| cg03646605 | ME3      | 1.51E-05 | 0.010805 | 78.20 | 79.75 | -1.55 |
| cg21241410 |          | 1.51E-05 | 0.010805 | 14.28 | 15.30 | -1.02 |
| cg21084508 | CCDC108  | 1.52E-05 | 0.010856 | 43.57 | 40.50 | 3.07  |
| cg22533683 | MIR193A  | 1.52E-05 | 0.010858 | 48.94 | 51.82 | -2.88 |
| cg11209447 | SCNN1A   | 1.54E-05 | 0.010951 | 69.21 | 70.48 | -1.27 |
| cg06872036 | RASSF5   | 1.55E-05 | 0.010999 | 78.30 | 79.41 | -1.11 |
| cg26859016 | IKBKE    | 1.58E-05 | 0.011225 | 65.84 | 67.44 | -1.61 |
| cg05091997 |          | 1.59E-05 | 0.011225 | 3.55  | 3.99  | -0.44 |
| cg09608073 | CHSY3    | 1.59E-05 | 0.01125  | 8.58  | 9.09  | -0.51 |
| cg20322193 | RALA     | 1.59E-05 | 0.011225 | 28.66 | 30.57 | -1.91 |
| cg18582010 | ASAP1    | 0.000016 | 0.011285 | 65.04 | 63.01 | 2.03  |
| cg00134210 | FAM107B  | 1.61E-05 | 0.011341 | 3.21  | 3.59  | -0.38 |
| cg05726935 | AKT1     | 1.62E-05 | 0.011379 | 54.25 | 55.56 | -1.31 |
| cg10666013 | ISLR     | 1.62E-05 | 0.01135  | 77.55 | 78.56 | -1.01 |
| cg12614244 | AP2A2    | 1.63E-05 | 0.011379 | 80.02 | 78.69 | 1.33  |
| cg24497361 | RHOG     | 1.63E-05 | 0.011379 | 27.47 | 28.72 | -1.25 |
| cg02755131 | CDH13    | 1.65E-05 | 0.011528 | 74.50 | 72.53 | 1.97  |
| cg07381806 | MOBK2A   | 1.66E-05 | 0.011528 | 21.45 | 23.60 | -2.15 |
| cg20850016 | ARL8B    | 1.66E-05 | 0.011528 | 5.35  | 5.84  | -0.49 |

|                 |         |          |          |       |       |       |
|-----------------|---------|----------|----------|-------|-------|-------|
| cg20871826      | CAMKK1  | 1.66E-05 | 0.011535 | 21.42 | 22.26 | -0.83 |
| cg01605984      | SNORD24 | 1.67E-05 | 0.011551 | 61.23 | 62.58 | -1.35 |
| cg21840875      | SMCR7L  | 1.67E-05 | 0.01154  | 48.73 | 50.03 | -1.30 |
| cg04149978      | CASZ1   | 1.68E-05 | 0.011592 | 70.11 | 72.09 | -1.98 |
| cg12556164      | GALNTL6 | 1.68E-05 | 0.011592 | 77.01 | 78.01 | -1.00 |
| cg05307957      | ARID1A  | 1.70E-05 | 0.011681 | 3.05  | 3.35  | -0.30 |
| cg05460226      | PIK3R5  | 1.70E-05 | 0.011681 | 31.79 | 33.36 | -1.57 |
| cg18252924      | STK24   | 1.71E-05 | 0.011734 | 62.99 | 64.41 | -1.41 |
| cg18503679      | ZNF385D | 1.71E-05 | 0.011728 | 1.33  | 1.89  | -0.56 |
| ch.2.30415474F  |         | 1.72E-05 | 0.011734 | 3.41  | 3.72  | -0.31 |
| cg10865498      | SRC     | 1.73E-05 | 0.011806 | 35.87 | 34.60 | 1.27  |
| cg01510278      |         | 1.74E-05 | 0.011812 | 3.91  | 4.28  | -0.37 |
| cg25114611      | FKBP5   | 1.74E-05 | 0.011812 | 31.00 | 32.12 | -1.12 |
| cg26282236      | RAD52   | 1.74E-05 | 0.01183  | 53.81 | 51.24 | 2.57  |
| cg14484649      | FAM181B | 1.75E-05 | 0.011874 | 16.15 | 16.85 | -0.71 |
| cg00357551      | FAM196B | 1.76E-05 | 0.01193  | 33.16 | 31.56 | 1.60  |
| cg05903736      | HDAC4   | 1.79E-05 | 0.012076 | 12.04 | 13.20 | -1.15 |
| cg22698028      | AHRR    | 1.81E-05 | 0.012215 | 11.32 | 10.22 | 1.10  |
| cg26572452      |         | 1.82E-05 | 0.012253 | 14.20 | 15.09 | -0.89 |
| cg16649560      | IL4R    | 1.83E-05 | 0.012306 | 16.74 | 17.53 | -0.79 |
| ch.12.55659191R |         | 1.85E-05 | 0.012456 | 1.82  | 2.02  | -0.20 |
| cg15505219      | PRKCH   | 1.86E-05 | 0.012492 | 75.33 | 77.26 | -1.94 |
| cg00026474      | ST3GAL1 | 1.87E-05 | 0.012504 | 19.36 | 20.70 | -1.34 |
| cg07741984      | C3orf52 | 1.87E-05 | 0.012496 | 11.84 | 12.43 | -0.59 |
| cg25252598      |         | 1.89E-05 | 0.012637 | 6.05  | 6.50  | -0.45 |
| cg15576342      |         | 1.91E-05 | 0.012711 | 68.57 | 69.92 | -1.36 |
| cg12303084      | ZMYND8  | 1.92E-05 | 0.012743 | 12.85 | 13.80 | -0.95 |
| cg24296397      | BSN     | 1.93E-05 | 0.01278  | 48.77 | 47.14 | 1.63  |
| cg15677364      | TUBB    | 1.94E-05 | 0.012813 | 22.09 | 23.41 | -1.32 |
| cg20146909      | LRRRC8D | 1.95E-05 | 0.0129   | 64.36 | 65.80 | -1.44 |
| cg26870865      | TFDP1   | 1.96E-05 | 0.0129   | 69.34 | 67.93 | 1.40  |
| cg23072383      | SLC35E4 | 1.99E-05 | 0.013092 | 5.90  | 6.49  | -0.59 |
| cg06554062      | GATAD2A | 0.00002  | 0.013177 | 5.11  | 5.46  | -0.35 |
| cg00505001      | MAB21L1 | 2.01E-05 | 0.013179 | 13.32 | 14.22 | -0.90 |
| cg00397859      | C20orf7 | 2.02E-05 | 0.013237 | 30.80 | 28.47 | 2.33  |
| cg17418085      | LAPTM5  | 2.04E-05 | 0.013347 | 5.55  | 5.97  | -0.42 |
| cg18879828      |         | 2.04E-05 | 0.013347 | 68.62 | 69.80 | -1.19 |
| cg06580770      | TNXB    | 2.05E-05 | 0.013373 | 66.02 | 67.35 | -1.32 |
| cg22638542      | SEC22C  | 2.05E-05 | 0.013347 | 82.09 | 81.13 | 0.96  |
| cg02610723      | FAM38A  | 2.07E-05 | 0.013438 | 5.36  | 5.90  | -0.54 |
| cg24709951      |         | 2.07E-05 | 0.013438 | 40.32 | 37.08 | 3.25  |
| cg01810186      |         | 2.09E-05 | 0.013524 | 43.55 | 46.41 | -2.86 |
| cg16190265      | PRKAR1B | 2.11E-05 | 0.013666 | 26.80 | 28.69 | -1.89 |
| cg09570614      |         | 2.15E-05 | 0.013888 | 42.49 | 41.00 | 1.49  |
| cg24427243      | TNFRSF8 | 2.15E-05 | 0.013868 | 55.20 | 57.36 | -2.15 |
| cg17328794      | NRBP2   | 2.19E-05 | 0.014122 | 3.58  | 3.85  | -0.26 |
| cg10099304      | TLE6    | 0.000022 | 0.014122 | 7.37  | 7.97  | -0.60 |
| cg19137417      |         | 0.000022 | 0.014146 | 73.21 | 75.13 | -1.92 |
| cg04372535      | AP2A2   | 2.22E-05 | 0.014211 | 81.01 | 79.66 | 1.35  |

|            |           |          |          |       |       |       |
|------------|-----------|----------|----------|-------|-------|-------|
| cg06184825 | CPNE5     | 2.22E-05 | 0.014211 | 62.79 | 65.67 | -2.88 |
| cg18329753 |           | 2.25E-05 | 0.014379 | 77.86 | 79.50 | -1.64 |
| cg04258133 | TNNT3     | 2.26E-05 | 0.01441  | 79.20 | 77.30 | 1.89  |
| cg20124610 | CARS2     | 2.26E-05 | 0.01441  | 45.32 | 46.71 | -1.39 |
| cg25341560 | SCN1B     | 2.28E-05 | 0.014479 | 43.91 | 46.77 | -2.86 |
| cg03999941 |           | 2.30E-05 | 0.014578 | 62.01 | 64.51 | -2.50 |
| cg08416875 | MAN1A1    | 2.30E-05 | 0.014578 | 5.78  | 5.41  | 0.37  |
| cg11674448 |           | 2.30E-05 | 0.014578 | 63.09 | 60.66 | 2.43  |
| cg01017464 | SNORD58A  | 2.31E-05 | 0.014583 | 17.14 | 18.49 | -1.34 |
| cg00436663 | LOC400927 | 2.32E-05 | 0.014669 | 4.87  | 5.23  | -0.36 |
| cg16151538 | TRPC4AP   | 2.33E-05 | 0.014669 | 48.91 | 47.51 | 1.40  |
| cg18369972 | GAS7      | 2.34E-05 | 0.014706 | 18.92 | 19.98 | -1.06 |
| cg26296488 | DRD5      | 2.34E-05 | 0.014719 | 8.05  | 6.86  | 1.19  |
| cg03047995 | FITM1     | 2.40E-05 | 0.015045 | 23.91 | 22.61 | 1.30  |
| cg07207669 | EFNA1     | 2.40E-05 | 0.015045 | 54.99 | 53.15 | 1.83  |
| cg03469233 |           | 2.41E-05 | 0.015083 | 47.40 | 44.40 | 3.00  |
| cg23233742 |           | 2.41E-05 | 0.015074 | 60.82 | 62.54 | -1.72 |
| cg05396397 | NPPA      | 2.43E-05 | 0.015157 | 45.04 | 42.39 | 2.65  |
| cg21108085 | CD82      | 2.43E-05 | 0.015157 | 10.31 | 11.00 | -0.69 |
| cg05076755 | LRRC32    | 2.45E-05 | 0.015241 | 77.95 | 79.44 | -1.49 |
| cg08202265 | TAC1      | 2.46E-05 | 0.015241 | 87.87 | 85.29 | 2.58  |
| cg20305005 | SCN2A     | 2.49E-05 | 0.015414 | 59.95 | 58.02 | 1.92  |
| cg11390978 | SIN3B     | 2.51E-05 | 0.015492 | 69.70 | 73.30 | -3.59 |
| cg21559386 | HNF4A     | 2.52E-05 | 0.015535 | 66.08 | 67.86 | -1.78 |
| cg09257526 | IL6R      | 2.58E-05 | 0.01588  | 20.95 | 21.63 | -0.69 |
| cg26038582 | HIVEP3    | 2.58E-05 | 0.015876 | 39.98 | 34.35 | 5.63  |
| cg04471192 |           | 0.000026 | 0.015987 | 82.27 | 80.83 | 1.43  |
| cg01377807 | C3orf26   | 2.61E-05 | 0.015987 | 52.30 | 54.37 | -2.07 |
| cg07651540 | LOC728606 | 2.61E-05 | 0.015987 | 54.55 | 52.85 | 1.70  |
| cg07660627 | ACACA     | 2.61E-05 | 0.015987 | 46.27 | 43.19 | 3.08  |
| cg12231340 | KRT81     | 2.68E-05 | 0.016339 | 74.83 | 77.32 | -2.49 |
| cg21086153 | CDC42BPB  | 2.68E-05 | 0.016339 | 9.56  | 8.82  | 0.74  |
| cg00496272 | CENPT     | 2.69E-05 | 0.016364 | 10.16 | 10.85 | -0.68 |
| cg12983285 | PTK6      | 2.69E-05 | 0.016364 | 6.53  | 7.23  | -0.70 |
| cg17769442 | ZNF296    | 2.70E-05 | 0.016364 | 7.83  | 8.39  | -0.57 |
| cg20912205 | NAT6      | 2.70E-05 | 0.016364 | 20.37 | 21.36 | -0.99 |
| cg09718582 |           | 2.74E-05 | 0.016568 | 54.93 | 57.37 | -2.44 |
| cg16660971 | RPTOR     | 2.74E-05 | 0.016565 | 71.31 | 68.05 | 3.26  |
| cg22851561 | C14orf43  | 2.76E-05 | 0.016682 | 42.09 | 43.66 | -1.57 |
| cg14943908 | BAT2      | 2.79E-05 | 0.016792 | 6.96  | 7.37  | -0.41 |
| cg07765674 |           | 2.81E-05 | 0.016922 | 56.36 | 57.66 | -1.30 |
| cg22510662 | C5orf33   | 2.83E-05 | 0.017009 | 66.98 | 64.98 | 2.00  |
| cg21916461 | LRP5      | 2.85E-05 | 0.017103 | 13.19 | 14.09 | -0.90 |
| cg15763258 | FLI1      | 2.87E-05 | 0.017159 | 68.48 | 69.92 | -1.45 |
| cg24149237 |           | 2.87E-05 | 0.017159 | 26.93 | 27.90 | -0.97 |
| cg19295068 | GLTSCR1   | 2.89E-05 | 0.017262 | 23.57 | 21.71 | 1.86  |
| cg02590572 | CHI3L2    | 2.90E-05 | 0.017262 | 78.35 | 76.95 | 1.39  |
| cg11788367 | ACVRL1    | 2.90E-05 | 0.017262 | 82.11 | 83.03 | -0.92 |
| cg06338710 | GFI1      | 2.94E-05 | 0.017435 | 77.15 | 79.05 | -1.90 |

|            |          |          |          |       |       |       |
|------------|----------|----------|----------|-------|-------|-------|
| cg05529343 |          | 2.95E-05 | 0.017489 | 34.00 | 29.83 | 4.17  |
| cg13411554 | CACNA1D  | 2.99E-05 | 0.017702 | 32.64 | 27.77 | 4.87  |
| cg22116041 | TMEM154  | 3.01E-05 | 0.017821 | 14.04 | 14.85 | -0.80 |
| cg13074055 |          | 3.02E-05 | 0.017837 | 38.84 | 42.78 | -3.94 |
| cg06087019 |          | 3.03E-05 | 0.017889 | 9.12  | 9.69  | -0.57 |
| cg15410835 |          | 3.04E-05 | 0.017889 | 43.45 | 46.60 | -3.15 |
| cg27287951 | ADAP1    | 3.05E-05 | 0.017889 | 86.29 | 84.05 | 2.24  |
| cg22932220 | NME2     | 3.07E-05 | 0.017991 | 3.52  | 3.79  | -0.27 |
| cg23762517 | HIVEP3   | 3.07E-05 | 0.017991 | 39.19 | 35.08 | 4.10  |
| cg13578306 |          | 3.08E-05 | 0.018008 | 71.76 | 70.28 | 1.48  |
| cg02756939 | C1orf97  | 3.11E-05 | 0.018127 | 13.90 | 15.57 | -1.67 |
| cg07218081 | CLEC3B   | 3.12E-05 | 0.01818  | 62.86 | 64.39 | -1.53 |
| cg25141995 | VDAC1    | 3.18E-05 | 0.018467 | 79.98 | 81.08 | -1.10 |
| cg11145461 | CSRP1    | 3.19E-05 | 0.018491 | 73.65 | 75.45 | -1.80 |
| cg14295611 |          | 0.000032 | 0.018545 | 69.87 | 68.10 | 1.77  |
| cg16360836 | HDAC4    | 3.22E-05 | 0.018636 | 14.97 | 15.87 | -0.90 |
| cg24127989 | IMPDH1   | 3.22E-05 | 0.018636 | 4.35  | 4.64  | -0.30 |
| cg05603910 | ANO9     | 0.000033 | 0.019074 | 75.94 | 73.94 | 2.00  |
| cg11014740 |          | 3.32E-05 | 0.019165 | 31.77 | 32.80 | -1.03 |
| cg18400079 | AFAP1    | 3.37E-05 | 0.019373 | 68.87 | 66.64 | 2.23  |
| cg26373411 | WDR67    | 3.37E-05 | 0.019373 | 4.55  | 4.90  | -0.35 |
| cg16043888 | TNFSF14  | 0.000034 | 0.019513 | 71.26 | 72.47 | -1.21 |
| cg07902156 | LPCAT1   | 3.41E-05 | 0.019537 | 23.32 | 25.00 | -1.68 |
| cg23343486 | SEPT7    | 3.42E-05 | 0.019578 | 4.77  | 5.18  | -0.41 |
| cg05557932 | CREBBP   | 3.45E-05 | 0.019713 | 29.52 | 30.78 | -1.26 |
| cg02524834 | CCND3    | 3.49E-05 | 0.019864 | 77.60 | 74.93 | 2.67  |
| cg05906166 | KLF2     | 3.49E-05 | 0.019864 | 24.53 | 27.48 | -2.95 |
| cg20017995 | SNORD24  | 3.49E-05 | 0.019864 | 61.23 | 62.56 | -1.33 |
| cg01243823 | NOD2     | 0.000035 | 0.01987  | 22.37 | 24.13 | -1.75 |
| cg02379082 |          | 0.000035 | 0.019877 | 8.63  | 9.24  | -0.62 |
| cg05875239 |          | 3.51E-05 | 0.019911 | 78.44 | 74.28 | 4.17  |
| cg03044533 | MAML2    | 3.54E-05 | 0.020002 | 36.77 | 35.03 | 1.74  |
| cg04625615 | ITPKA    | 3.54E-05 | 0.020002 | 72.40 | 74.22 | -1.82 |
| cg14232218 |          | 3.54E-05 | 0.020002 | 82.84 | 84.85 | -2.01 |
| cg21091547 | CDKN1A   | 3.55E-05 | 0.020009 | 57.42 | 59.84 | -2.42 |
| cg21696256 |          | 3.55E-05 | 0.020009 | 80.03 | 81.49 | -1.46 |
| cg12406027 | PAK4     | 3.56E-05 | 0.020015 | 20.95 | 21.93 | -0.99 |
| cg03743262 |          | 3.57E-05 | 0.020049 | 76.39 | 75.06 | 1.33  |
| cg12198704 |          | 3.58E-05 | 0.020082 | 13.76 | 14.76 | -1.00 |
| cg02029908 | DUSP1    | 3.59E-05 | 0.020118 | 86.31 | 84.83 | 1.48  |
| cg13855261 | HS3ST3B1 | 0.000036 | 0.020129 | 15.36 | 16.46 | -1.10 |
| cg23646614 | PTPRJ    | 0.000036 | 0.020129 | 18.17 | 18.78 | -0.61 |
| cg13543915 |          | 3.61E-05 | 0.020137 | 63.24 | 64.49 | -1.25 |
| cg01657995 | C6orf48  | 3.66E-05 | 0.020334 | 8.77  | 9.50  | -0.74 |
| cg23162201 | LMO1     | 3.66E-05 | 0.020334 | 71.04 | 68.52 | 2.52  |
| cg15095917 | CD68     | 3.67E-05 | 0.020334 | 13.10 | 13.96 | -0.85 |
| cg26724967 | IL32     | 3.67E-05 | 0.020334 | 60.29 | 61.94 | -1.65 |
| cg14408447 |          | 3.68E-05 | 0.020334 | 44.37 | 41.07 | 3.29  |
| cg02003183 | CDC42BPB | 3.69E-05 | 0.020407 | 6.82  | 6.06  | 0.76  |

|            |          |          |          |       |       |       |
|------------|----------|----------|----------|-------|-------|-------|
| cg15429214 |          | 3.72E-05 | 0.02051  | 62.79 | 66.27 | -3.48 |
| cg19798735 | IMMP2L   | 3.74E-05 | 0.020601 | 58.75 | 60.83 | -2.08 |
| cg01020987 | C1orf174 | 3.75E-05 | 0.020621 | 22.09 | 23.54 | -1.46 |
| cg21698310 | PPP1R9B  | 3.75E-05 | 0.020621 | 10.39 | 11.17 | -0.78 |
| cg20727233 | ASNS     | 3.76E-05 | 0.020621 | 8.70  | 9.26  | -0.56 |
| cg23721083 | ITGA11   | 3.83E-05 | 0.020968 | 5.92  | 6.44  | -0.52 |
| cg02032558 |          | 3.84E-05 | 0.020992 | 26.14 | 27.96 | -1.82 |
| cg25191725 | PYY2     | 3.85E-05 | 0.021046 | 81.21 | 82.53 | -1.32 |
| cg05058354 | INTS1    | 3.87E-05 | 0.021115 | 56.59 | 57.95 | -1.35 |
| cg27017172 | POLR2C   | 3.87E-05 | 0.021115 | 7.19  | 7.84  | -0.65 |
| cg11832281 | CUGBP2   | 3.94E-05 | 0.021434 | 4.00  | 4.34  | -0.34 |
| cg04652522 | CANX     | 3.95E-05 | 0.021499 | 14.26 | 15.01 | -0.75 |
| cg03508212 | RPS7     | 3.98E-05 | 0.021567 | 7.17  | 7.78  | -0.61 |
| cg17690322 | CORO1B   | 3.98E-05 | 0.021564 | 58.49 | 59.89 | -1.40 |
| cg21171320 | TRPM3    | 3.98E-05 | 0.021564 | 22.93 | 23.85 | -0.92 |
| cg03913271 | MICALL1  | 4.00E-05 | 0.02162  | 4.29  | 4.53  | -0.25 |
| cg13434489 | PRDM16   | 4.00E-05 | 0.02162  | 80.16 | 81.91 | -1.75 |
| cg00091589 | KLHDC4   | 4.03E-05 | 0.02173  | 88.64 | 87.03 | 1.62  |
| cg00148223 |          | 4.04E-05 | 0.021763 | 62.14 | 63.53 | -1.39 |
| cg06361984 | NDE1     | 4.05E-05 | 0.021792 | 81.49 | 79.90 | 1.58  |
| cg07177756 | SNORD75  | 4.06E-05 | 0.021792 | 18.35 | 19.91 | -1.56 |
| cg24455969 |          | 4.06E-05 | 0.021792 | 46.35 | 49.19 | -2.84 |
| cg08772028 | AMICA1   | 4.08E-05 | 0.02185  | 37.98 | 39.56 | -1.58 |
| cg20942162 |          | 4.01E-05 | 0.021945 | 46.37 | 44.97 | 1.39  |
| cg27171474 | CDCA8    | 4.11E-05 | 0.021951 | 85.85 | 84.87 | 0.98  |
| cg08529529 | ALOX5AP  | 4.15E-05 | 0.022118 | 10.55 | 11.29 | -0.74 |
| cg12392519 | PHOSPHO1 | 4.15E-05 | 0.022118 | 43.95 | 41.81 | 2.14  |
| cg22601421 | RBM47    | 4.15E-05 | 0.022118 | 4.25  | 3.93  | 0.32  |
| cg09081994 | CDGAP    | 4.16E-05 | 0.022132 | 65.69 | 64.15 | 1.55  |
| cg14099685 | CUGBP1   | 4.21E-05 | 0.022358 | 26.38 | 27.35 | -0.97 |
| cg25462795 | HNRNPL   | 4.22E-05 | 0.02238  | 4.21  | 4.50  | -0.29 |
| cg09646173 | PDE6A    | 4.23E-05 | 0.022381 | 40.38 | 42.10 | -1.71 |
| cg00390253 | SLC38A3  | 4.25E-05 | 0.022489 | 67.62 | 68.88 | -1.27 |
| cg05756780 | IL6R     | 4.27E-05 | 0.022489 | 23.25 | 24.18 | -0.93 |
| cg06806711 | MS4A1    | 4.28E-05 | 0.022489 | 35.85 | 34.67 | 1.18  |
| cg09933323 | CENPF    | 4.28E-05 | 0.022489 | 83.01 | 80.72 | 2.29  |
| cg21927363 | C9orf93  | 4.28E-05 | 0.022489 | 7.13  | 7.52  | -0.39 |
| cg26189021 | KCNC4    | 4.28E-05 | 0.022489 | 58.42 | 59.95 | -1.53 |
| cg09325711 | RALA     | 4.29E-05 | 0.022489 | 5.77  | 6.32  | -0.55 |
| cg11417675 | UCP2     | 4.29E-05 | 0.022489 | 7.86  | 8.53  | -0.67 |
| cg05055821 |          | 4.31E-05 | 0.022573 | 9.82  | 9.18  | 0.64  |
| cg24535439 | MMP23B   | 4.33E-05 | 0.022616 | 19.71 | 21.25 | -1.54 |
| cg25568061 |          | 4.33E-05 | 0.022616 | 18.33 | 17.62 | 0.71  |
| cg06803614 | NT5C1A   | 4.34E-05 | 0.022624 | 70.07 | 71.39 | -1.31 |
| cg11405655 |          | 4.35E-05 | 0.022654 | 13.65 | 14.86 | -1.21 |
| cg27262054 | ZFH3     | 4.35E-05 | 0.022645 | 66.11 | 68.02 | -1.91 |
| cg17087741 |          | 4.37E-05 | 0.022666 | 68.62 | 72.73 | -4.11 |
| cg16071219 | LPAR6    | 4.39E-05 | 0.022666 | 40.07 | 42.76 | -2.69 |
| cg06223834 | ADCY9    | 4.40E-05 | 0.022666 | 76.29 | 80.08 | -3.78 |

|            |           |          |          |       |       |       |
|------------|-----------|----------|----------|-------|-------|-------|
| cg07683388 | ANKRD44   | 4.40E-05 | 0.022666 | 58.24 | 60.24 | -2.01 |
| cg09357462 | DUSP5     | 4.40E-05 | 0.022666 | 53.71 | 55.50 | -1.80 |
| cg22425466 | RNF208    | 4.40E-05 | 0.022666 | 74.89 | 76.00 | -1.11 |
| cg23825480 | MORC2     | 4.40E-05 | 0.022666 | 41.65 | 38.81 | 2.84  |
| cg03384915 | SIN3B     | 4.41E-05 | 0.022666 | 74.69 | 76.62 | -1.94 |
| cg07166654 |           | 4.41E-05 | 0.022666 | 3.62  | 3.08  | 0.54  |
| cg00858599 |           | 4.42E-05 | 0.022666 | 9.85  | 10.42 | -0.57 |
| cg05985317 | PRRT1     | 4.42E-05 | 0.022666 | 40.08 | 41.98 | -1.90 |
| cg07267166 | ZNF323    | 4.42E-05 | 0.022666 | 6.54  | 6.99  | -0.45 |
| cg18900812 | CDKN1A    | 4.43E-05 | 0.022666 | 14.92 | 16.21 | -1.28 |
| cg01414934 | SH3BGRL3  | 4.45E-05 | 0.022714 | 7.99  | 8.42  | -0.42 |
| cg05329578 |           | 4.45E-05 | 0.022714 | 25.63 | 28.41 | -2.78 |
| cg21121843 | HTT       | 4.46E-05 | 0.022717 | 22.25 | 24.23 | -1.98 |
| cg12103569 | SFRS8     | 4.47E-05 | 0.022718 | 34.52 | 33.21 | 1.31  |
| cg06968354 | ZNF423    | 4.48E-05 | 0.022783 | 82.93 | 81.79 | 1.14  |
| cg06394460 | LNX2      | 4.51E-05 | 0.022902 | 49.73 | 52.69 | -2.96 |
| cg17873451 | LOC440925 | 4.53E-05 | 0.022939 | 3.80  | 4.13  | -0.33 |
| cg26908328 | SERINC5   | 4.53E-05 | 0.022945 | 9.38  | 10.24 | -0.85 |
| cg01955533 | CDKN1A    | 4.57E-05 | 0.023083 | 19.63 | 20.37 | -0.74 |
| cg06065019 |           | 4.57E-05 | 0.023083 | 11.14 | 12.63 | -1.49 |
| cg13744172 |           | 4.58E-05 | 0.023083 | 12.44 | 13.13 | -0.69 |
| cg04359840 | XYLT1     | 0.000046 | 0.023147 | 48.26 | 50.05 | -1.79 |
| cg05059607 | PITPNC1   | 4.61E-05 | 0.023181 | 27.77 | 25.98 | 1.79  |
| cg12689529 | KIRREL3   | 4.67E-05 | 0.023481 | 6.80  | 7.40  | -0.61 |
| cg02101876 |           | 4.72E-05 | 0.023645 | 5.45  | 4.99  | 0.46  |
| cg16702313 | C14orf43  | 4.72E-05 | 0.023645 | 62.08 | 63.25 | -1.17 |
| cg08942527 | EFNA5     | 4.74E-05 | 0.023741 | 77.25 | 75.90 | 1.35  |
| cg24488469 |           | 4.75E-05 | 0.023771 | 15.10 | 16.03 | -0.94 |
| cg03547355 |           | 4.77E-05 | 0.02382  | 54.63 | 55.84 | -1.21 |
| cg14738823 | ERP27     | 4.80E-05 | 0.023937 | 59.28 | 57.61 | 1.67  |
| cg07877900 | GPR114    | 4.81E-05 | 0.023948 | 9.60  | 8.81  | 0.79  |
| cg07925587 | KRT80     | 4.81E-05 | 0.023948 | 6.63  | 7.18  | -0.55 |
| cg08242636 | CBFB      | 4.89E-05 | 0.024292 | 5.17  | 5.54  | -0.37 |
| cg24201362 |           | 4.89E-05 | 0.024284 | 87.94 | 89.79 | -1.86 |
| cg09162537 | AP2A2     | 4.92E-05 | 0.024296 | 35.24 | 33.61 | 1.62  |
| cg11666770 |           | 4.92E-05 | 0.024296 | 70.97 | 76.63 | -5.65 |
| cg26346875 | VAR5      | 4.92E-05 | 0.024296 | 5.79  | 6.16  | -0.37 |
| cg02740606 | CORO1B    | 4.93E-05 | 0.024296 | 67.82 | 69.61 | -1.79 |
| cg22596049 | GAS7      | 4.93E-05 | 0.024296 | 71.32 | 72.39 | -1.07 |
| cg26988138 | GNG7      | 4.93E-05 | 0.024296 | 12.64 | 10.15 | 2.49  |
| cg13299325 |           | 4.94E-05 | 0.024296 | 55.91 | 57.94 | -2.03 |
| cg12883279 | PPT2      | 4.95E-05 | 0.024329 | 73.80 | 77.28 | -3.49 |
| cg10116432 | NT5C2     | 4.96E-05 | 0.024329 | 23.22 | 24.65 | -1.43 |
| cg19202384 | PYCR1     | 5.02E-05 | 0.024582 | 67.35 | 68.85 | -1.50 |
| cg26470501 | BCL3      | 5.03E-05 | 0.024601 | 48.86 | 50.30 | -1.44 |
| cg24968629 | CELSR1    | 5.04E-05 | 0.02463  | 69.57 | 65.77 | 3.80  |
| cg24924577 | SEMA4B    | 5.05E-05 | 0.02463  | 28.03 | 26.46 | 1.56  |
| cg21879146 |           | 5.07E-05 | 0.024703 | 64.59 | 62.03 | 2.56  |
| cg03233656 | SLC1A4    | 5.09E-05 | 0.024787 | 23.77 | 25.93 | -2.15 |



|            |           |          |          |       |       |       |
|------------|-----------|----------|----------|-------|-------|-------|
| cg15930380 | MIER1     | 5.11E-05 | 0.02486  | 26.41 | 24.50 | 1.91  |
| cg19859980 | C1orf97   | 5.15E-05 | 0.02503  | 2.65  | 2.83  | -0.18 |
| cg02573176 | SLC10A5   | 5.17E-05 | 0.025077 | 30.09 | 28.71 | 1.38  |
| cg16804020 | KLF6      | 5.17E-05 | 0.025077 | 0.11  | 0.15  | -0.04 |
| cg24212517 | GRN       | 5.21E-05 | 0.025186 | 9.07  | 9.59  | -0.51 |
| cg15554421 | C3orf26   | 5.22E-05 | 0.025212 | 5.20  | 5.60  | -0.39 |
| cg01431482 | PRDM16    | 5.23E-05 | 0.025212 | 53.27 | 55.07 | -1.80 |
| cg12033822 | SLC35C2   | 5.25E-05 | 0.025304 | 25.89 | 26.89 | -1.00 |
| cg18515591 | BTG4      | 5.27E-05 | 0.025362 | 8.02  | 8.54  | -0.52 |
| cg12421110 | C13orf15  | 5.28E-05 | 0.025362 | 72.76 | 71.48 | 1.28  |
| cg10807309 | VAR5      | 5.31E-05 | 0.025479 | 34.13 | 32.52 | 1.61  |
| cg11261850 |           | 5.33E-05 | 0.025542 | 28.40 | 26.69 | 1.72  |
| cg17256711 | OPRM1     | 5.34E-05 | 0.025574 | 15.31 | 13.97 | 1.34  |
| cg19406367 | SGIP1     | 5.35E-05 | 0.025574 | 67.45 | 65.33 | 2.11  |
| cg04519775 |           | 5.38E-05 | 0.025701 | 53.90 | 55.22 | -1.31 |
| cg09037630 |           | 5.39E-05 | 0.025737 | 10.61 | 11.42 | -0.82 |
| cg03427663 |           | 5.40E-05 | 0.025757 | 11.77 | 12.35 | -0.58 |
| cg04560741 | LOC388796 | 5.41E-05 | 0.025773 | 79.14 | 80.01 | -0.87 |
| cg03294491 | SMAD2     | 5.47E-05 | 0.025996 | 12.18 | 13.02 | -0.84 |
| cg07201017 | FLJ41350  | 5.48E-05 | 0.026037 | 16.52 | 17.21 | -0.69 |
| cg12804677 | PRDM16    | 5.49E-05 | 0.026075 | 65.48 | 66.78 | -1.30 |
| cg09710580 | ZNF786    | 5.50E-05 | 0.026079 | 85.47 | 86.48 | -1.01 |
| cg24247537 | PTDSS2    | 5.53E-05 | 0.026173 | 9.34  | 8.36  | 0.98  |
| cg02968508 | IL17RE    | 5.54E-05 | 0.026216 | 72.75 | 74.06 | -1.31 |
| cg10825315 | TSHR      | 5.56E-05 | 0.026245 | 27.65 | 26.25 | 1.39  |
| cg04119529 | NTHL1     | 5.58E-05 | 0.026278 | 61.41 | 60.07 | 1.35  |
| cg15030712 | CHN2      | 5.58E-05 | 0.026278 | 19.95 | 20.89 | -0.94 |
| cg26790897 | SUMF2     | 5.58E-05 | 0.026278 | 39.62 | 38.05 | 1.57  |
| cg01911191 |           | 5.59E-05 | 0.026278 | 2.36  | 2.09  | 0.27  |
| cg04425624 | TNF       | 5.62E-05 | 0.026359 | 11.64 | 12.57 | -0.93 |
| cg07969918 | PIK3IP1   | 5.62E-05 | 0.026357 | 30.45 | 31.54 | -1.09 |
| cg22159815 | MIR29C    | 5.62E-05 | 0.026357 | 26.32 | 25.29 | 1.03  |
| cg18946533 | SH2D7     | 5.64E-05 | 0.026394 | 57.38 | 55.84 | 1.54  |
| cg13087259 |           | 5.65E-05 | 0.026394 | 23.13 | 24.25 | -1.12 |
| cg06959021 | TCHP      | 5.66E-05 | 0.026394 | 60.69 | 59.24 | 1.45  |
| cg13934406 | PPT2      | 5.66E-05 | 0.026394 | 77.85 | 80.60 | -2.75 |
| cg10894991 |           | 5.73E-05 | 0.026672 | 65.02 | 66.27 | -1.25 |
| cg23423933 | CTTN      | 5.73E-05 | 0.026672 | 79.43 | 80.50 | -1.07 |
| cg01107874 | C10orf41  | 5.74E-05 | 0.02668  | 77.93 | 79.73 | -1.80 |
| cg22526531 | KIAA0319L | 5.76E-05 | 0.026724 | 40.89 | 39.93 | 0.96  |
| cg24095374 | RGS14     | 5.76E-05 | 0.026724 | 5.37  | 5.79  | -0.42 |
| cg18369990 | FBLN7     | 5.78E-05 | 0.026745 | 52.77 | 51.20 | 1.58  |
| cg27514333 | SMAD6     | 5.78E-05 | 0.026745 | 14.92 | 15.86 | -0.93 |
| cg09374353 | EHD1      | 5.79E-05 | 0.026767 | 19.45 | 20.40 | -0.94 |
| cg03193328 | TPST1     | 5.80E-05 | 0.026767 | 14.68 | 13.78 | 0.90  |
| cg12864721 | C10orf41  | 5.83E-05 | 0.02687  | 16.29 | 18.55 | -2.26 |
| cg16755922 | FOXP2     | 5.83E-05 | 0.02687  | 65.14 | 62.81 | 2.33  |
| cg26133399 | FAM19A2   | 5.84E-05 | 0.026898 | 11.18 | 10.18 | 0.99  |
| cg08006956 | LSM4      | 5.85E-05 | 0.026915 | 65.98 | 67.35 | -1.36 |

|            |          |          |          |       |       |       |
|------------|----------|----------|----------|-------|-------|-------|
| cg02512902 | KSR1     | 5.87E-05 | 0.026968 | 59.81 | 61.32 | -1.51 |
| cg03061612 | TTL9     | 0.000059 | 0.027078 | 60.27 | 58.74 | 1.53  |
| cg18033416 | RHBDL3   | 5.92E-05 | 0.027112 | 58.63 | 60.37 | -1.74 |
| cg18335931 | MAST3    | 5.94E-05 | 0.027161 | 19.14 | 20.38 | -1.23 |
| cg07756788 |          | 5.95E-05 | 0.027161 | 70.81 | 72.17 | -1.36 |
| cg09465703 | JMJD8    | 5.95E-05 | 0.027161 | 11.40 | 12.93 | -1.53 |
| cg13096701 | RAPGEF2  | 5.95E-05 | 0.027161 | 79.25 | 76.89 | 2.36  |
| cg04843111 | BCAN     | 5.98E-05 | 0.027247 | 50.87 | 52.60 | -1.74 |
| cg24173182 | HIC1     | 6.09E-05 | 0.027736 | 31.98 | 29.56 | 2.42  |
| cg09222732 |          | 6.16E-05 | 0.02801  | 82.22 | 83.50 | -1.28 |
| cg15114651 | SLC1A5   | 6.18E-05 | 0.028027 | 49.22 | 50.50 | -1.28 |
| cg18691800 | RBM24    | 6.18E-05 | 0.028027 | 0.34  | 0.27  | 0.08  |
| cg04583842 | BANP     | 6.20E-05 | 0.028052 | 35.19 | 33.23 | 1.96  |
| cg16116321 | FAM124B  | 6.20E-05 | 0.028052 | 50.17 | 51.89 | -1.72 |
| cg20698113 | PIM3     | 6.20E-05 | 0.028052 | 75.49 | 76.78 | -1.29 |
| cg12029639 | MIR548F5 | 6.22E-05 | 0.028078 | 26.77 | 28.49 | -1.72 |
| cg25753024 | SSH3     | 6.22E-05 | 0.028078 | 3.14  | 3.65  | -0.51 |
| cg06501716 | C22orf39 | 6.23E-05 | 0.028092 | 56.28 | 57.73 | -1.44 |
| cg22715788 | IQCE     | 6.25E-05 | 0.028114 | 83.95 | 82.37 | 1.58  |
| cg26878709 | TMEM136  | 6.29E-05 | 0.028275 | 52.36 | 50.30 | 2.06  |
| cg07298482 | SUNC1    | 0.000063 | 0.028301 | 78.72 | 76.56 | 2.15  |
| cg19220282 | SLC1A4   | 6.31E-05 | 0.028301 | 22.02 | 24.99 | -2.98 |
| cg19319393 | GPR153   | 6.31E-05 | 0.028301 | 24.00 | 22.66 | 1.34  |
| cg24142464 | PABPC4   | 6.37E-05 | 0.028529 | 10.27 | 10.95 | -0.68 |
| cg22950598 | GDF11    | 6.38E-05 | 0.028545 | 61.81 | 63.40 | -1.59 |
| cg09636849 |          | 6.40E-05 | 0.028595 | 1.37  | 1.59  | -0.21 |
| cg25233339 | ATP1B3   | 6.48E-05 | 0.028884 | 3.06  | 3.40  | -0.34 |
| cg07626482 | SLC1A5   | 6.49E-05 | 0.028884 | 25.53 | 26.52 | -0.99 |
| cg17759095 | DST      | 6.49E-05 | 0.028884 | 27.27 | 29.18 | -1.91 |
| cg05302701 | NFATC1   | 6.51E-05 | 0.028969 | 79.23 | 80.39 | -1.16 |
| cg24852032 | SYNGAP1  | 6.55E-05 | 0.029095 | 5.08  | 5.54  | -0.46 |
| cg08386696 | BAHCC1   | 6.56E-05 | 0.02911  | 76.01 | 76.97 | -0.95 |
| cg03194226 | CLEC3B   | 6.59E-05 | 0.029206 | 82.52 | 83.53 | -1.01 |
| cg04086928 | RAPGEF1  | 6.59E-05 | 0.029206 | 64.15 | 65.68 | -1.53 |
| cg08606254 | AHRR     | 6.60E-05 | 0.029216 | 84.70 | 83.12 | 1.58  |
| cg13676312 | DPT      | 6.63E-05 | 0.029312 | 78.59 | 79.53 | -0.93 |
| cg06060868 | SDHA     | 6.64E-05 | 0.029312 | 75.45 | 76.52 | -1.07 |
| cg04997045 | CTBP1    | 6.66E-05 | 0.02937  | 54.30 | 52.10 | 2.20  |
| cg05871756 |          | 6.71E-05 | 0.029551 | 27.11 | 28.10 | -1.00 |
| cg00793186 | NRG2     | 6.72E-05 | 0.029565 | 25.29 | 26.64 | -1.35 |
| cg02557933 | SPEG     | 6.73E-05 | 0.029565 | 56.19 | 57.65 | -1.46 |
| cg04388657 | RPL35    | 6.74E-05 | 0.029565 | 46.40 | 48.28 | -1.88 |
| cg07730673 | PIGX     | 6.75E-05 | 0.029565 | 4.20  | 4.44  | -0.24 |
| cg08528970 |          | 6.75E-05 | 0.029565 | 14.31 | 14.91 | -0.60 |
| cg14950321 | PLIN5    | 6.76E-05 | 0.029608 | 41.56 | 43.24 | -1.68 |
| cg11010122 | DNAJB14  | 6.77E-05 | 0.02961  | 3.42  | 3.76  | -0.34 |
| cg00575674 |          | 6.79E-05 | 0.029642 | 20.07 | 21.88 | -1.81 |
| cg16481281 | IL11     | 6.79E-05 | 0.029644 | 4.84  | 5.27  | -0.43 |
| cg01290345 | TMEM104  | 6.83E-05 | 0.029769 | 6.71  | 7.16  | -0.45 |

|                |           |          |          |       |       |       |
|----------------|-----------|----------|----------|-------|-------|-------|
| cg24242519     | FAM49A    | 6.84E-05 | 0.029784 | 13.58 | 14.63 | -1.05 |
| cg04871173     | MAD1L1    | 6.85E-05 | 0.029784 | 85.07 | 86.18 | -1.11 |
| cg25298754     | ZBED2     | 6.86E-05 | 0.029796 | 49.09 | 50.61 | -1.53 |
| cg00308065     | CCDC92    | 6.87E-05 | 0.029823 | 74.17 | 72.82 | 1.36  |
| cg08062087     | C2orf66   | 6.89E-05 | 0.029852 | 69.18 | 67.43 | 1.75  |
| cg27574654     | IL19      | 6.90E-05 | 0.029883 | 67.59 | 65.15 | 2.44  |
| cg01005180     | PRKAG2    | 6.95E-05 | 0.030012 | 54.13 | 55.43 | -1.30 |
| cg13092108     | RPS6KA1   | 6.95E-05 | 0.030012 | 31.30 | 32.36 | -1.06 |
| cg24715767     | PRDM2     | 6.95E-05 | 0.030012 | 59.88 | 58.10 | 1.78  |
| cg13693328     |           | 6.96E-05 | 0.030012 | 25.23 | 26.34 | -1.11 |
| cg05626073     | AP2A2     | 7.00E-05 | 0.030129 | 29.38 | 26.02 | 3.37  |
| cg21503834     | MAD1L1    | 7.00E-05 | 0.030129 | 77.70 | 76.37 | 1.33  |
| cg07643930     | ZNF598    | 7.01E-05 | 0.030129 | 8.77  | 9.40  | -0.63 |
| cg02135077     |           | 7.02E-05 | 0.030129 | 6.66  | 7.18  | -0.53 |
| cg06193043     | NPPA      | 7.03E-05 | 0.030129 | 53.23 | 50.43 | 2.80  |
| cg22396280     |           | 7.03E-05 | 0.030129 | 71.69 | 70.39 | 1.30  |
| cg10520740     | CACNA2D4  | 7.05E-05 | 0.030166 | 57.41 | 58.74 | -1.32 |
| cg13910681     | FAM102A   | 7.05E-05 | 0.030166 | 10.04 | 10.62 | -0.58 |
| cg21884062     | MIR548F5  | 7.08E-05 | 0.030262 | 4.18  | 4.53  | -0.35 |
| cg17971578     | STK40     | 7.12E-05 | 0.03038  | 20.52 | 21.50 | -0.98 |
| cg01919999     | GNB2L1    | 7.13E-05 | 0.03038  | 17.32 | 18.23 | -0.91 |
| cg11197664     |           | 7.14E-05 | 0.03038  | 71.62 | 68.68 | 2.94  |
| cg08708790     |           | 7.15E-05 | 0.03038  | 58.51 | 59.58 | -1.08 |
| cg17755386     | SNORD46   | 7.15E-05 | 0.03038  | 16.08 | 16.91 | -0.84 |
| cg10861146     | EFNA1     | 7.16E-05 | 0.03038  | 13.18 | 13.94 | -0.76 |
| cg21190381     | LOC100302 | 7.17E-05 | 0.030427 | 2.11  | 1.86  | 0.25  |
| cg11701312     | RPS5      | 7.23E-05 | 0.030628 | 48.45 | 49.77 | -1.31 |
| cg20306574     | FITM1     | 7.26E-05 | 0.030675 | 60.02 | 57.64 | 2.37  |
| cg00070899     | GRM4      | 7.27E-05 | 0.030675 | 76.93 | 79.45 | -2.52 |
| cg11222173     | RPTOR     | 7.27E-05 | 0.030675 | 61.29 | 59.24 | 2.05  |
| cg21631918     | STRA6     | 7.27E-05 | 0.030675 | 50.67 | 52.45 | -1.78 |
| cg06893362     | C2orf199  | 7.28E-05 | 0.030675 | 58.29 | 59.90 | -1.61 |
| cg17133388     | FAM162A   | 0.000073 | 0.030723 | 7.92  | 8.61  | -0.70 |
| cg09636313     |           | 7.37E-05 | 0.030986 | 59.78 | 57.65 | 2.13  |
| cg10076395     |           | 7.37E-05 | 0.030986 | 71.31 | 69.85 | 1.46  |
| ch.6.33611621F |           | 0.000074 | 0.031047 | 1.72  | 1.94  | -0.21 |
| cg08397747     | SPDYA     | 7.42E-05 | 0.031094 | 83.15 | 80.85 | 2.30  |
| cg20317123     | TCF21     | 7.43E-05 | 0.031094 | 12.69 | 13.35 | -0.65 |
| cg22011809     | POPDC3    | 7.43E-05 | 0.031094 | 85.09 | 83.57 | 1.52  |
| cg05898881     |           | 7.47E-05 | 0.031212 | 85.52 | 86.33 | -0.82 |
| cg07742396     |           | 0.000075 | 0.031329 | 41.90 | 43.34 | -1.44 |
| cg26280998     |           | 7.53E-05 | 0.03141  | 52.20 | 50.70 | 1.50  |
| cg08324925     | CSF2      | 7.55E-05 | 0.031417 | 60.21 | 61.53 | -1.32 |
| cg19190487     | ITSN1     | 7.55E-05 | 0.031417 | 88.75 | 87.79 | 0.96  |
| cg24524451     | ADCK2     | 7.55E-05 | 0.031417 | 1.39  | 1.71  | -0.32 |
| cg20456732     |           | 7.58E-05 | 0.0315   | 66.44 | 67.93 | -1.49 |
| cg12559228     | C19orf76  | 0.000076 | 0.031541 | 68.63 | 70.02 | -1.39 |
| cg27165835     | PAOX      | 7.62E-05 | 0.031601 | 62.53 | 60.67 | 1.86  |
| cg06518831     | BAT4      | 7.63E-05 | 0.031601 | 11.00 | 11.58 | -0.57 |

|            |           |          |          |       |       |       |
|------------|-----------|----------|----------|-------|-------|-------|
| cg04039397 | CD96      | 7.64E-05 | 0.031614 | 21.49 | 23.38 | -1.89 |
| cg08601457 | FYN       | 7.69E-05 | 0.031781 | 6.42  | 7.02  | -0.60 |
| cg12621745 | PLEC1     | 0.000077 | 0.031787 | 70.14 | 71.33 | -1.19 |
| cg15157628 | C10orf128 | 0.000077 | 0.031787 | 86.14 | 86.94 | -0.80 |
| cg02672759 |           | 7.76E-05 | 0.03199  | 70.49 | 72.25 | -1.75 |
| cg05299486 | ATP6V0A1  | 7.77E-05 | 0.032006 | 2.34  | 1.99  | 0.35  |
| cg05238276 |           | 7.82E-05 | 0.032151 | 82.51 | 80.77 | 1.74  |
| cg20388732 | STAT5A    | 7.82E-05 | 0.032155 | 5.56  | 6.06  | -0.51 |
| cg01055579 | NLE1      | 7.84E-05 | 0.032192 | 3.44  | 3.78  | -0.34 |
| cg27310311 |           | 7.88E-05 | 0.032327 | 79.48 | 80.42 | -0.94 |
| cg05548393 | SLC30A8   | 0.000079 | 0.032353 | 78.63 | 76.65 | 1.98  |
| cg06784339 | MKRN1     | 7.97E-05 | 0.032606 | 5.22  | 5.57  | -0.35 |
| cg16718162 | MDS2      | 8.03E-05 | 0.0328   | 9.37  | 10.04 | -0.67 |
| cg17333042 | KAZALD1   | 8.08E-05 | 0.032976 | 37.69 | 38.97 | -1.27 |
| cg14780837 | SYNGR1    | 8.12E-05 | 0.033094 | 10.09 | 10.95 | -0.86 |
| cg00082939 | C10orf41  | 8.14E-05 | 0.033142 | 46.31 | 48.74 | -2.43 |
| cg06037693 | RUNX3     | 8.15E-05 | 0.033149 | 76.20 | 77.40 | -1.20 |
| cg02149899 |           | 8.17E-05 | 0.033213 | 53.66 | 55.32 | -1.66 |
| cg14920846 | NAV1      | 8.19E-05 | 0.033245 | 42.70 | 46.18 | -3.48 |
| cg15727507 | B3GNTL1   | 8.19E-05 | 0.033245 | 45.79 | 44.30 | 1.49  |
| cg07512814 | LDLR      | 0.000082 | 0.033252 | 36.22 | 38.22 | -2.00 |
| cg08330132 |           | 8.22E-05 | 0.033268 | 80.25 | 81.73 | -1.48 |
| cg10012530 | HS6ST1    | 8.23E-05 | 0.033275 | 70.75 | 72.12 | -1.37 |
| cg09182189 | NADK      | 8.26E-05 | 0.033365 | 24.21 | 25.21 | -1.00 |
| cg07450086 | SELT      | 8.27E-05 | 0.033365 | 22.91 | 24.07 | -1.16 |
| cg09006487 | RYBP      | 8.27E-05 | 0.033365 | 18.17 | 19.36 | -1.19 |
| cg01677623 | ARHGAP22  | 8.32E-05 | 0.033494 | 71.46 | 72.57 | -1.12 |
| cg25577463 | VENTX     | 8.32E-05 | 0.033494 | 3.85  | 3.43  | 0.42  |
| cg13594903 | STOML2    | 8.34E-05 | 0.03353  | 7.06  | 7.70  | -0.65 |
| cg00295485 | UXS1      | 8.37E-05 | 0.033584 | 43.03 | 44.73 | -1.71 |
| cg20780180 | SNX24     | 8.37E-05 | 0.033584 | 59.96 | 61.74 | -1.78 |
| cg03378003 | SETD2     | 8.38E-05 | 0.033584 | 85.00 | 84.01 | 0.99  |
| cg16664394 | CCNO      | 8.38E-05 | 0.033584 | 9.65  | 10.23 | -0.57 |
| cg01201215 | ATOX1     | 0.000084 | 0.033585 | 59.03 | 60.51 | -1.48 |
| cg24771152 | VAR5      | 0.000084 | 0.033585 | 85.62 | 81.79 | 3.83  |
| cg24531401 | INTS1     | 8.42E-05 | 0.033627 | 21.67 | 22.51 | -0.84 |
| cg08305533 | SFI1      | 8.44E-05 | 0.033663 | 41.73 | 40.06 | 1.67  |
| cg17930194 | LHX6      | 8.47E-05 | 0.03376  | 26.77 | 29.24 | -2.46 |
| cg08170227 | ACTN1     | 8.48E-05 | 0.03376  | 43.25 | 45.03 | -1.79 |
| cg23063243 | ONECUT1   | 8.49E-05 | 0.033779 | 10.22 | 10.92 | -0.69 |
| cg04726360 |           | 8.51E-05 | 0.033842 | 68.56 | 70.81 | -2.25 |
| cg17827670 | AHCYL2    | 8.53E-05 | 0.03387  | 7.95  | 8.48  | -0.54 |
| cg08687386 | IER3      | 8.58E-05 | 0.034032 | 4.88  | 5.18  | -0.30 |
| cg26853536 | UBC       | 0.000086 | 0.034097 | 44.82 | 46.69 | -1.87 |
| cg01768201 |           | 8.72E-05 | 0.03452  | 4.51  | 4.84  | -0.33 |
| cg24560678 |           | 8.73E-05 | 0.034528 | 68.06 | 64.77 | 3.29  |
| cg01081263 | SCUBE2    | 8.84E-05 | 0.034931 | 33.69 | 35.34 | -1.65 |
| cg02055540 |           | 8.86E-05 | 0.034976 | 25.60 | 27.91 | -2.30 |
| cg05205351 | NOP56     | 8.87E-05 | 0.034976 | 25.29 | 26.42 | -1.13 |

|            |           |          |          |       |       |       |
|------------|-----------|----------|----------|-------|-------|-------|
| cg18900669 | CD68      | 8.88E-05 | 0.034976 | 13.79 | 14.56 | -0.77 |
| cg09931909 | C6orf150  | 8.89E-05 | 0.035012 | 41.75 | 44.61 | -2.86 |
| cg22242842 |           | 8.96E-05 | 0.035222 | 8.22  | 9.13  | -0.91 |
| cg05256179 | BAT5      | 8.99E-05 | 0.035309 | 83.24 | 84.26 | -1.01 |
| cg01744331 | KCNQ1OT1  | 9.05E-05 | 0.035536 | 73.15 | 76.07 | -2.92 |
| cg06433467 |           | 9.11E-05 | 0.035713 | 6.23  | 7.05  | -0.82 |
| cg04806562 | TEX19     | 9.12E-05 | 0.035736 | 38.24 | 37.14 | 1.10  |
| cg02174884 | TNNC2     | 9.25E-05 | 0.03618  | 50.97 | 52.69 | -1.72 |
| cg07063068 | GPR68     | 9.25E-05 | 0.03618  | 4.59  | 5.20  | -0.60 |
| cg09570958 | HS3ST3B1  | 9.28E-05 | 0.036244 | 14.60 | 15.58 | -0.98 |
| cg16143804 | MSH5      | 9.31E-05 | 0.036324 | 6.41  | 6.77  | -0.35 |
| cg02104644 | SYT7      | 9.34E-05 | 0.036386 | 19.45 | 20.90 | -1.45 |
| cg10047572 | IER3      | 9.34E-05 | 0.036386 | 8.51  | 9.02  | -0.51 |
| cg21222350 |           | 9.38E-05 | 0.036516 | 66.52 | 67.71 | -1.19 |
| cg14560670 | LOC145837 | 9.48E-05 | 0.036809 | 39.36 | 40.76 | -1.41 |
| cg25474070 | IL3       | 9.49E-05 | 0.036827 | 64.30 | 65.67 | -1.37 |
| cg18327772 | HMGB4     | 9.52E-05 | 0.03691  | 74.95 | 76.33 | -1.38 |
| cg14217495 |           | 9.53E-05 | 0.03691  | 8.21  | 8.97  | -0.76 |
| cg22977892 |           | 9.54E-05 | 0.036929 | 19.21 | 20.33 | -1.13 |
| cg26437697 | SAMD4A    | 9.55E-05 | 0.036936 | 41.06 | 39.69 | 1.37  |
| cg03784994 | HCCA2     | 0.000096 | 0.037064 | 96.35 | 94.86 | 1.49  |
| cg19696491 | CHRNA5    | 0.000096 | 0.037064 | 44.40 | 42.22 | 2.18  |
| cg14590011 |           | 9.62E-05 | 0.037091 | 34.85 | 36.25 | -1.41 |
| cg16379091 |           | 9.63E-05 | 0.037091 | 70.43 | 71.91 | -1.48 |
| cg04540406 | SHCBP1    | 9.64E-05 | 0.037091 | 12.62 | 13.41 | -0.79 |
| cg19137107 |           | 9.66E-05 | 0.037135 | 45.06 | 46.80 | -1.74 |
| cg12827530 | RNU5E     | 9.68E-05 | 0.037166 | 18.74 | 17.48 | 1.27  |
| cg14614490 | PHF19     | 0.000097 | 0.037224 | 60.55 | 61.71 | -1.16 |
| cg21268578 | GGA1      | 0.000098 | 0.037539 | 6.04  | 6.61  | -0.57 |
| cg26879059 |           | 0.000098 | 0.037539 | 19.93 | 21.38 | -1.46 |
| cg24151027 | SCAMP1    | 9.81E-05 | 0.037539 | 1.68  | 1.88  | -0.20 |
| cg06100161 | RORA      | 9.83E-05 | 0.037589 | 63.20 | 65.14 | -1.94 |
| cg05593162 | SDCCAG8   | 9.89E-05 | 0.037718 | 46.62 | 44.92 | 1.71  |
| cg09142135 | TCIRG1    | 9.89E-05 | 0.037718 | 83.10 | 84.39 | -1.29 |
| cg04531781 |           | 9.92E-05 | 0.037773 | 51.77 | 48.94 | 2.83  |
| cg22162848 | ITGB4     | 9.94E-05 | 0.037808 | 56.13 | 58.20 | -2.07 |
| cg12573705 | MIR548F5  | 9.96E-05 | 0.037873 | 8.00  | 8.74  | -0.74 |
| cg06459104 | EPB41L3   | 9.98E-05 | 0.037886 | 34.76 | 38.17 | -3.41 |
| cg26968812 | TPM4      | 9.98E-05 | 0.037886 | 11.13 | 11.68 | -0.55 |
| cg05323272 | TTC39A    | 9.99E-05 | 0.037886 | 80.07 | 84.02 | -3.95 |
| cg03514843 | EMILIN1   | 0.0001   | 0.037907 | 61.91 | 63.42 | -1.52 |
| cg02895394 | PRKDC     | 0.0001   | 0.037907 | 75.97 | 77.16 | -1.18 |
| cg00624799 | ZNF710    | 0.0001   | 0.037972 | 75.36 | 76.84 | -1.48 |
| cg06177555 | SPN       | 0.000101 | 0.03802  | 37.39 | 36.12 | 1.26  |
| cg01286191 | PRKDC     | 0.000101 | 0.038159 | 89.18 | 90.29 | -1.11 |
| cg13379236 | EGF       | 0.000101 | 0.038159 | 62.37 | 60.91 | 1.47  |
| cg04490079 | OR5K2     | 0.000101 | 0.038159 | 79.42 | 77.18 | 2.25  |
| cg26890706 | RNF182    | 0.000101 | 0.038159 | 61.89 | 64.04 | -2.15 |
| cg13278353 |           | 0.000101 | 0.038159 | 13.61 | 14.92 | -1.31 |

|                 |          |          |          |       |       |       |
|-----------------|----------|----------|----------|-------|-------|-------|
| cg11069824      | CHD5     | 0.000102 | 0.03823  | 56.74 | 58.15 | -1.41 |
| cg00469602      |          | 0.000102 | 0.038311 | 17.04 | 18.04 | -1.00 |
| cg22490254      |          | 0.000102 | 0.038311 | 15.21 | 13.94 | 1.27  |
| cg08287903      | UGT8     | 0.000103 | 0.038472 | 50.70 | 48.90 | 1.80  |
| cg20550262      |          | 0.000103 | 0.038529 | 75.44 | 77.80 | -2.36 |
| cg02218496      |          | 0.000103 | 0.038529 | 26.85 | 27.92 | -1.07 |
| cg02998240      |          | 0.000103 | 0.038529 | 61.61 | 64.61 | -3.00 |
| cg20530056      | IKBKE    | 0.000103 | 0.038575 | 65.58 | 66.87 | -1.29 |
| ch.1.159013533R |          | 0.000103 | 0.038575 | 3.68  | 3.92  | -0.24 |
| cg18526008      |          | 0.000104 | 0.038701 | 4.34  | 4.68  | -0.34 |
| cg09425279      |          | 0.000104 | 0.038701 | 62.76 | 61.35 | 1.41  |
| cg18507732      |          | 0.000104 | 0.038701 | 52.49 | 54.34 | -1.84 |
| cg22686881      | TLX3     | 0.000105 | 0.038895 | 11.51 | 10.76 | 0.75  |
| cg13359998      | GALNT2   | 0.000105 | 0.038973 | 13.61 | 14.57 | -0.96 |
| cg17993335      | DNMBP    | 0.000106 | 0.039177 | 78.67 | 76.86 | 1.81  |
| cg16492833      | C6orf125 | 0.000106 | 0.039177 | 9.74  | 10.67 | -0.94 |
| cg12044210      | APBA2    | 0.000106 | 0.039177 | 70.06 | 68.94 | 1.12  |
| cg18350524      | UBE2N    | 0.000106 | 0.039177 | 8.08  | 8.70  | -0.63 |
| cg02013841      |          | 0.000106 | 0.039177 | 59.55 | 61.88 | -2.34 |
| cg08259514      |          | 0.000106 | 0.0393   | 4.14  | 3.61  | 0.53  |
| cg02470690      |          | 0.000107 | 0.039306 | 8.27  | 8.82  | -0.56 |
| cg16151960      | PHF15    | 0.000107 | 0.039577 | 60.22 | 61.39 | -1.17 |
| cg01668352      | SRGAP1   | 0.000108 | 0.039665 | 75.92 | 77.17 | -1.25 |
| cg00013899      | CACHD1   | 0.000108 | 0.039679 | 74.84 | 72.95 | 1.89  |
| cg10317175      |          | 0.000108 | 0.039731 | 29.80 | 30.91 | -1.11 |
| cg25642234      | PLBD1    | 0.000108 | 0.03979  | 57.82 | 59.64 | -1.82 |
| cg08173709      | FOXP1    | 0.000109 | 0.039871 | 48.18 | 46.96 | 1.22  |
| cg06695691      | SPATA5   | 0.00011  | 0.040149 | 49.68 | 47.12 | 2.56  |
| cg13816423      | FOXP4    | 0.00011  | 0.040216 | 49.88 | 51.64 | -1.76 |
| cg19265289      | ARRB2    | 0.00011  | 0.040336 | 5.18  | 5.54  | -0.36 |
| cg21010646      | TTC24    | 0.00011  | 0.040345 | 75.78 | 77.40 | -1.62 |
| cg12306833      |          | 0.000111 | 0.040603 | 74.44 | 75.54 | -1.11 |
| cg14958080      | TERT     | 0.000112 | 0.040783 | 89.24 | 90.14 | -0.89 |
| cg04992852      |          | 0.000112 | 0.040799 | 85.31 | 83.87 | 1.44  |
| cg07949433      | SCARNA16 | 0.000112 | 0.040799 | 8.10  | 8.66  | -0.56 |
| cg14588638      | EWSR1    | 0.000112 | 0.040799 | 5.47  | 5.84  | -0.37 |
| cg06285727      | ATG16L2  | 0.000112 | 0.040801 | 8.29  | 8.91  | -0.62 |
| cg02010481      | JAZF1    | 0.000112 | 0.040806 | 11.73 | 12.63 | -0.90 |
| cg18295744      | ZMIZ1    | 0.000113 | 0.040948 | 64.00 | 65.10 | -1.09 |
| cg11152412      | EDC3     | 0.000114 | 0.041351 | 8.96  | 9.53  | -0.57 |
| cg25212025      | PARD3    | 0.000114 | 0.041351 | 32.33 | 33.96 | -1.63 |
| cg26840970      | ZNF19    | 0.000114 | 0.041351 | 70.89 | 69.03 | 1.86  |
| cg13066481      | MYLK     | 0.000114 | 0.041416 | 41.75 | 42.94 | -1.19 |
| cg02104700      | S100P    | 0.000115 | 0.041492 | 2.56  | 2.76  | -0.19 |
| cg26722342      | ITGA2    | 0.000115 | 0.041555 | 67.89 | 69.60 | -1.71 |
| cg02962647      |          | 0.000115 | 0.041555 | 64.24 | 62.87 | 1.37  |
| cg02797271      | GPR132   | 0.000116 | 0.041752 | 6.83  | 7.30  | -0.46 |
| cg16312514      | SHANK2   | 0.000116 | 0.041787 | 16.53 | 15.25 | 1.29  |
| cg14093936      | SEMA7A   | 0.000117 | 0.041937 | 28.11 | 28.99 | -0.88 |

|                |          |          |          |       |       |       |
|----------------|----------|----------|----------|-------|-------|-------|
| cg00631221     | REPS1    | 0.000117 | 0.041976 | 7.83  | 8.43  | -0.60 |
| cg13698937     | C4orf46  | 0.000117 | 0.04202  | 77.10 | 75.15 | 1.95  |
| cg03594515     |          | 0.000117 | 0.04202  | 9.77  | 10.28 | -0.51 |
| cg17983064     | IL3      | 0.000117 | 0.04202  | 45.47 | 43.68 | 1.79  |
| cg26457878     | ZNF815   | 0.000118 | 0.042092 | 5.45  | 4.93  | 0.52  |
| cg08867399     | HS6ST1   | 0.000118 | 0.042092 | 57.15 | 59.67 | -2.52 |
| cg08519905     | CD9      | 0.000118 | 0.042092 | 26.49 | 27.33 | -0.84 |
| ch.4.13872363R |          | 0.000118 | 0.042267 | 0.53  | 0.41  | 0.11  |
| cg19034132     |          | 0.000119 | 0.042473 | 3.65  | 3.95  | -0.30 |
| cg15378486     |          | 0.000119 | 0.042549 | 33.99 | 35.14 | -1.15 |
| cg09250678     |          | 0.00012  | 0.042603 | 6.86  | 7.75  | -0.89 |
| cg17662387     | ABLIM1   | 0.00012  | 0.042617 | 3.50  | 2.88  | 0.62  |
| cg09166091     |          | 0.00012  | 0.042679 | 15.34 | 14.46 | 0.88  |
| cg15815084     | DGKE     | 0.00012  | 0.042714 | 47.83 | 51.10 | -3.27 |
| cg10801607     | SLC3A1   | 0.00012  | 0.042772 | 18.16 | 17.29 | 0.87  |
| cg22006825     | HNRNPUL1 | 0.000121 | 0.042772 | 19.93 | 20.73 | -0.80 |
| cg05665093     | OBFC2A   | 0.000121 | 0.042905 | 82.76 | 80.92 | 1.84  |
| cg21310090     | PLTP     | 0.000121 | 0.042929 | 33.90 | 33.05 | 0.85  |
| cg09372617     | NEK7     | 0.000121 | 0.042929 | 60.66 | 58.74 | 1.92  |
| cg01836137     | INF2     | 0.000122 | 0.043184 | 47.14 | 45.52 | 1.62  |
| cg00099441     |          | 0.000122 | 0.043184 | 6.23  | 6.81  | -0.58 |
| cg19028369     | C3orf19  | 0.000123 | 0.043252 | 4.47  | 4.72  | -0.25 |
| cg02646480     |          | 0.000123 | 0.043263 | 80.73 | 81.82 | -1.09 |
| cg06491451     | HSBP1L1  | 0.000123 | 0.043263 | 59.92 | 61.41 | -1.49 |
| cg27569706     | LTBP1    | 0.000123 | 0.043458 | 27.96 | 29.53 | -1.57 |
| cg22501483     |          | 0.000124 | 0.043637 | 72.04 | 70.94 | 1.10  |
| cg14621336     |          | 0.000124 | 0.043637 | 76.91 | 78.11 | -1.20 |
| cg14242895     | MLL      | 0.000125 | 0.043734 | 57.22 | 55.74 | 1.48  |
| cg03509898     | ZFYVE21  | 0.000125 | 0.043858 | 78.42 | 77.02 | 1.40  |
| cg06397161     | SYNGR1   | 0.000125 | 0.043895 | 44.19 | 45.71 | -1.52 |
| cg11404945     |          | 0.000125 | 0.043903 | 75.93 | 77.08 | -1.15 |
| cg00300750     | OSR2     | 0.000125 | 0.043903 | 4.14  | 4.40  | -0.26 |
| cg04985185     | MBTPS1   | 0.000126 | 0.044232 | 84.52 | 82.91 | 1.61  |
| cg20926024     |          | 0.000127 | 0.04424  | 8.48  | 8.97  | -0.49 |
| cg16872613     |          | 0.000127 | 0.044337 | 71.96 | 70.63 | 1.33  |
| cg05289698     | GCNT3    | 0.000127 | 0.044356 | 69.62 | 67.80 | 1.82  |
| cg05277504     | ASPSR1   | 0.000128 | 0.044519 | 90.01 | 91.31 | -1.30 |
| cg14610746     | CLN6     | 0.000128 | 0.0446   | 3.10  | 3.34  | -0.24 |
| cg13428066     | KCNQ1    | 0.000128 | 0.0446   | 33.20 | 31.97 | 1.23  |
| cg10270430     | GRM4     | 0.000128 | 0.0446   | 66.35 | 68.51 | -2.16 |
| cg01609214     | MIR30D   | 0.000129 | 0.044645 | 90.75 | 88.27 | 2.49  |
| cg00246451     | ARHGEF2  | 0.000129 | 0.044645 | 5.03  | 5.50  | -0.48 |
| cg08278008     |          | 0.000129 | 0.044715 | 6.37  | 6.94  | -0.56 |
| cg23680451     | KLF6     | 0.000129 | 0.044778 | 13.91 | 15.11 | -1.20 |
| cg03505125     | TRIM75   | 0.000129 | 0.044778 | 73.37 | 74.46 | -1.09 |
| cg24271203     | IL31     | 0.000129 | 0.044778 | 65.26 | 66.65 | -1.39 |
| cg27366280     | TRAK1    | 0.00013  | 0.044798 | 71.00 | 72.16 | -1.17 |
| cg08354053     | RHBDL3   | 0.00013  | 0.044798 | 55.18 | 56.54 | -1.36 |
| cg19399165     | EMILIN1  | 0.00013  | 0.045004 | 59.99 | 62.11 | -2.12 |

|                |          |          |          |       |       |       |
|----------------|----------|----------|----------|-------|-------|-------|
| cg20938359     | SLC6A12  | 0.000131 | 0.045046 | 26.71 | 25.77 | 0.93  |
| cg02571448     | PCBP3    | 0.000131 | 0.045046 | 42.58 | 44.30 | -1.72 |
| cg00063111     | SNORA6   | 0.000131 | 0.045046 | 13.69 | 15.11 | -1.42 |
| cg05525812     |          | 0.000131 | 0.045136 | 15.87 | 16.79 | -0.91 |
| cg11363234     |          | 0.000131 | 0.045136 | 62.70 | 64.41 | -1.71 |
| cg15723874     | MEF2D    | 0.000132 | 0.045136 | 65.74 | 66.97 | -1.23 |
| cg22079019     | ECEL1    | 0.000132 | 0.045136 | 66.66 | 68.20 | -1.54 |
| cg14179401     |          | 0.000132 | 0.045228 | 34.93 | 35.88 | -0.94 |
| cg22112435     | POMGNT1  | 0.000132 | 0.045304 | 5.41  | 5.91  | -0.50 |
| cg23928726     | PEX10    | 0.000133 | 0.045312 | 25.12 | 26.57 | -1.45 |
| cg26682866     | CDK5R2   | 0.000133 | 0.045312 | 4.78  | 5.04  | -0.26 |
| cg24980413     | AHRR     | 0.000133 | 0.045312 | 61.41 | 58.99 | 2.42  |
| cg23670519     |          | 0.000133 | 0.045312 | 26.23 | 23.99 | 2.24  |
| cg18490846     | C17orf73 | 0.000133 | 0.045409 | 65.31 | 66.45 | -1.14 |
| cg18033092     | C11orf49 | 0.000133 | 0.045409 | 50.13 | 48.92 | 1.21  |
| cg27430293     |          | 0.000133 | 0.045409 | 36.27 | 34.29 | 1.99  |
| cg15058557     | SYNC     | 0.000134 | 0.045447 | 67.24 | 68.47 | -1.23 |
| cg17472111     |          | 0.000134 | 0.045496 | 21.65 | 20.84 | 0.81  |
| cg01357381     |          | 0.000134 | 0.045496 | 7.38  | 7.75  | -0.37 |
| cg22114489     |          | 0.000134 | 0.045517 | 12.79 | 10.97 | 1.81  |
| cg25722983     | STK40    | 0.000134 | 0.045517 | 46.98 | 48.30 | -1.33 |
| cg12076915     |          | 0.000134 | 0.045517 | 61.35 | 63.31 | -1.96 |
| cg10898310     | UBAC2    | 0.000135 | 0.045604 | 53.56 | 52.22 | 1.34  |
| cg13705391     | PRRT1    | 0.000135 | 0.045634 | 19.36 | 21.00 | -1.64 |
| cg08778287     | IGF1R    | 0.000135 | 0.045634 | 32.47 | 30.40 | 2.07  |
| cg09811127     | MORN1    | 0.000135 | 0.045634 | 80.57 | 81.41 | -0.83 |
| cg13595518     | DAB2IP   | 0.000135 | 0.045634 | 1.22  | 1.45  | -0.22 |
| cg22892904     | CBX2     | 0.000135 | 0.045634 | 32.38 | 33.52 | -1.14 |
| cg27418217     | HOMER2   | 0.000136 | 0.045661 | 22.82 | 22.04 | 0.78  |
| cg17493193     | PDIK1L   | 0.000137 | 0.045927 | 81.60 | 80.56 | 1.04  |
| cg12279125     |          | 0.000137 | 0.045954 | 70.57 | 68.54 | 2.03  |
| ch.8.49582343R |          | 0.000137 | 0.045954 | 1.94  | 2.11  | -0.17 |
| cg20889322     |          | 0.000137 | 0.046028 | 15.73 | 16.89 | -1.16 |
| cg24541193     | SLC19A2  | 0.000138 | 0.046129 | 51.04 | 48.91 | 2.14  |
| cg18745507     | ZGLP1    | 0.000138 | 0.046149 | 57.12 | 55.77 | 1.35  |
| cg00255726     | DOK2     | 0.000138 | 0.046326 | 7.54  | 6.95  | 0.59  |
| cg27631057     |          | 0.000139 | 0.046381 | 71.59 | 73.48 | -1.89 |
| cg16365445     | ITGB1    | 0.000139 | 0.046392 | 82.87 | 81.50 | 1.37  |
| cg10612237     | ZMIZ1    | 0.000139 | 0.046392 | 5.14  | 5.49  | -0.35 |
| cg03867607     | MYL6     | 0.000139 | 0.046392 | 4.54  | 4.93  | -0.39 |
| cg10232140     | ERCC6    | 0.000139 | 0.046392 | 1.74  | 1.40  | 0.34  |
| cg10691866     | TPST1    | 0.00014  | 0.046487 | 37.68 | 39.88 | -2.20 |
| cg13734518     | DLD      | 0.00014  | 0.046556 | 85.85 | 84.15 | 1.70  |
| cg04811945     | CD38     | 0.00014  | 0.046556 | 14.48 | 13.70 | 0.79  |
| cg26196424     | C14orf37 | 0.00014  | 0.046625 | 57.26 | 59.10 | -1.84 |
| cg22190721     | ESRP2    | 0.000141 | 0.04663  | 79.27 | 80.78 | -1.51 |
| cg02325250     | CSF2     | 0.000141 | 0.04663  | 48.96 | 50.30 | -1.34 |
| cg05208153     | C9orf25  | 0.000141 | 0.046649 | 75.78 | 76.81 | -1.04 |
| cg13800721     | PRDM16   | 0.000141 | 0.04668  | 75.42 | 76.40 | -0.98 |



|            |           |          |          |       |       |       |
|------------|-----------|----------|----------|-------|-------|-------|
| cg21381845 | PRKAR1B   | 0.000141 | 0.046704 | 53.15 | 54.58 | -1.43 |
| cg14521421 | ST5       | 0.000141 | 0.04673  | 74.67 | 75.85 | -1.17 |
| cg05637113 | SRFBP1    | 0.000141 | 0.04673  | 69.60 | 68.24 | 1.37  |
| cg05047401 | SEMA4A    | 0.000143 | 0.047225 | 8.96  | 7.92  | 1.04  |
| cg03220447 | NAV2      | 0.000143 | 0.047225 | 12.77 | 13.38 | -0.61 |
| cg09068286 | GFPT2     | 0.000144 | 0.047225 | 51.20 | 53.27 | -2.07 |
| cg07285276 | RAPGEF1   | 0.000144 | 0.047225 | 72.23 | 73.53 | -1.31 |
| cg18473686 | SYN3      | 0.000144 | 0.047225 | 47.29 | 48.79 | -1.50 |
| cg16565913 | RBM47     | 0.000144 | 0.047225 | 7.35  | 6.59  | 0.77  |
| cg25115829 | SUZ12P    | 0.000144 | 0.047225 | 74.42 | 72.26 | 2.15  |
| cg01970407 | AHRR      | 0.000144 | 0.047225 | 76.38 | 74.53 | 1.85  |
| cg17831440 | MCF2L     | 0.000144 | 0.047225 | 83.53 | 81.56 | 1.97  |
| cg13722127 | RARRES2   | 0.000144 | 0.047225 | 23.78 | 25.17 | -1.39 |
| cg04890576 |           | 0.000144 | 0.047225 | 26.60 | 24.18 | 2.42  |
| cg24512005 | NAP1L4    | 0,000144 | 0,047225 | 23,09 | 24,00 | -0,91 |
| cg19048950 | LOC100188 | 0,000144 | 0,047238 | 73,63 | 71,88 | 1,75  |
| cg00216361 | GAP43     | 0,000145 | 0,047328 | 3,53  | 3,74  | -0,22 |
| cg05894970 | CDGAP     | 0,000145 | 0,047328 | 14,62 | 15,48 | -0,86 |
| cg16022904 | RPS6KA1   | 0,000145 | 0,047328 | 23,14 | 23,89 | -0,75 |
| cg13989999 | BCL2L1    | 0,000145 | 0,047328 | 48,29 | 49,67 | -1,38 |
| cg14774585 | NBEA      | 0,000145 | 0,047328 | 23,53 | 25,23 | -1,70 |
| cg24482246 |           | 0,000146 | 0,047372 | 81,44 | 79,98 | 1,46  |
| cg23639734 | SOD3      | 0,000146 | 0,047372 | 71,37 | 70,27 | 1,09  |
| cg00123478 | ZNF518B   | 0,000146 | 0,047419 | 41,60 | 43,28 | -1,69 |
| cg16844292 | NCRNA0017 | 0,000146 | 0,047419 | 82,16 | 83,10 | -0,95 |
| cg22805381 |           | 0,000146 | 0,047456 | 55,78 | 57,42 | -1,64 |
| cg10454258 | IL21R     | 0,000147 | 0,047504 | 31,35 | 30,31 | 1,05  |
| cg17241657 | AP1AR     | 0,000147 | 0,047551 | 1,53  | 1,39  | 0,15  |
| cg19744173 | FBLN7     | 0,000147 | 0,047716 | 17,11 | 16,32 | 0,79  |
| cg04324758 | KLF2      | 0,000148 | 0,047721 | 2,28  | 2,57  | -0,29 |
| cg03884592 | HIVEP3    | 0,000148 | 0,047743 | 25,92 | 23,16 | 2,76  |
| cg08742502 | PRDM1     | 0,000148 | 0,047794 | 42,06 | 44,28 | -2,22 |
| cg17676574 | UROC1     | 0,000148 | 0,04782  | 69,51 | 70,59 | -1,08 |
| cg17496794 | PRKDC     | 0,000149 | 0,047831 | 86,68 | 87,63 | -0,95 |
| cg09205438 | GABRG3    | 0,000149 | 0,047957 | 59,49 | 57,98 | 1,51  |
| cg04195000 | TTC38     | 0,000149 | 0,048021 | 79,24 | 78,18 | 1,07  |
| cg14254419 | AMPD2     | 0,00015  | 0,048261 | 3,14  | 3,31  | -0,17 |
| cg00313914 | NAV1      | 0,000151 | 0,048603 | 43,80 | 48,37 | -4,57 |
| cg10665960 | EPC2      | 0,000152 | 0,048831 | 4,78  | 5,04  | -0,27 |
| cg00872580 | PFKFB3    | 0,000153 | 0,048929 | 67,39 | 66,11 | 1,28  |
| cg12616487 | ROM1      | 0,000153 | 0,048955 | 43,68 | 44,80 | -1,12 |
| cg02890250 | HSH2D     | 0,000153 | 0,048955 | 79,45 | 77,85 | 1,60  |
| cg21005412 | WDR43     | 0,000153 | 0,048999 | 38,67 | 37,73 | 0,94  |
| cg07620039 |           | 0,000154 | 0,0491   | 4,96  | 5,29  | -0,33 |
| cg04987734 | CDC42BPB  | 0,000154 | 0,0491   | 32,49 | 31,05 | 1,44  |
| cg17532753 | HDAC4     | 0,000154 | 0,0491   | 68,68 | 66,81 | 1,87  |
| cg16341979 | IFI27     | 0,000155 | 0,04945  | 78,77 | 79,81 | -1,04 |
| cg06321596 | XYLT1     | 0,000156 | 0,049619 | 27,35 | 28,94 | -1,59 |
| cg22934035 | LTB       | 0,000156 | 0,049662 | 3,38  | 3,63  | -0,24 |

|            |         |          |          |       |       |       |
|------------|---------|----------|----------|-------|-------|-------|
| cg07411111 | TPD52L2 | 0,000156 | 0,049724 | 62,69 | 60,75 | 1,94  |
| cg00041047 | SLC6A16 | 0,000157 | 0,049724 | 81,20 | 77,76 | 3,45  |
| cg09893465 | INPP5A  | 0,000157 | 0,049724 | 87,32 | 83,93 | 3,39  |
| cg05789250 | C6orf48 | 0,000157 | 0,049726 | 18,35 | 19,98 | -1,63 |
| cg16515974 | DDAH2   | 0,000157 | 0,049733 | 73,72 | 74,70 | -0,98 |
| cg06627354 | TRPM8   | 0,000158 | 0,049889 | 63,78 | 61,77 | 2,00  |

Suppl. Table S3: Overlap between the signals significant ( $p < 0.05$ ) for sex-specific rank differences in each resampling cycle and those observed in the full population (“target list”, shown in Tables 2 and 3). The cumulative mean overlap for a given resampling round is calculated as the average of the % overlaps of the current and all preceding resamplings.

| resampling round | epigenetics (target N=92)    |           |                             | transcriptomics (target N=26) |           |                             |
|------------------|------------------------------|-----------|-----------------------------|-------------------------------|-----------|-----------------------------|
|                  | overlap                      |           |                             | overlap                       |           |                             |
|                  | overlap with target list (N) | % overlap | cumulative mean overlap (%) | overlap with target list (N)  | % overlap | cumulative mean overlap (%) |
| 1                | 28                           | 30.4      | 30.4                        | 17                            | 68.0      | 68.0                        |
| 2                | 47                           | 51.1      | 40.8                        | 15                            | 60.0      | 64.0                        |
| 3                | 53                           | 57.6      | 46.4                        | 15                            | 60.0      | 62.7                        |
| 4                | 50                           | 54.3      | 48.4                        | 12                            | 48.0      | 59.0                        |
| 5                | 46                           | 50.0      | 48.7                        | 13                            | 52.0      | 57.6                        |
| 6                | 49                           | 53.3      | 49.5                        | 6                             | 24.0      | 52.0                        |
| 7                | 48                           | 52.2      | 49.8                        | 14                            | 56.0      | 52.6                        |
| 8                | 48                           | 52.2      | 50.1                        | 13                            | 52.0      | 52.5                        |
| 9                | 51                           | 55.4      | 50.7                        | 7                             | 28.0      | 49.8                        |
| 10               | 43                           | 46.7      | 50.3                        | 15                            | 60.0      | 50.8                        |

Suppl. Fig. 1: Distribution of p-values of sex-specific rank differences of transcriptomic (N=350; left) and epigenetic (N=1,273; right) signals. The dotted lines indicate the limit of  $p=0.05$  and the blue bars the corresponding signals.

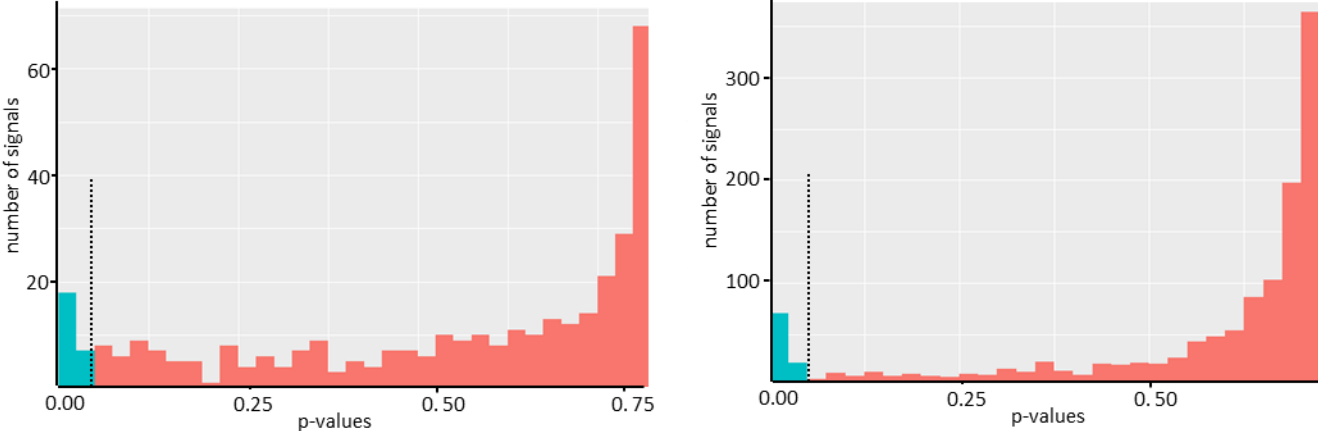

Suppl. Fig. S2: Cumulative overlap with target signals during 10 resamplings (arranged in random order) with sex-balanced populations; each y-axis value represents the average overlap of the corresponding resampling round and all preceding ones.

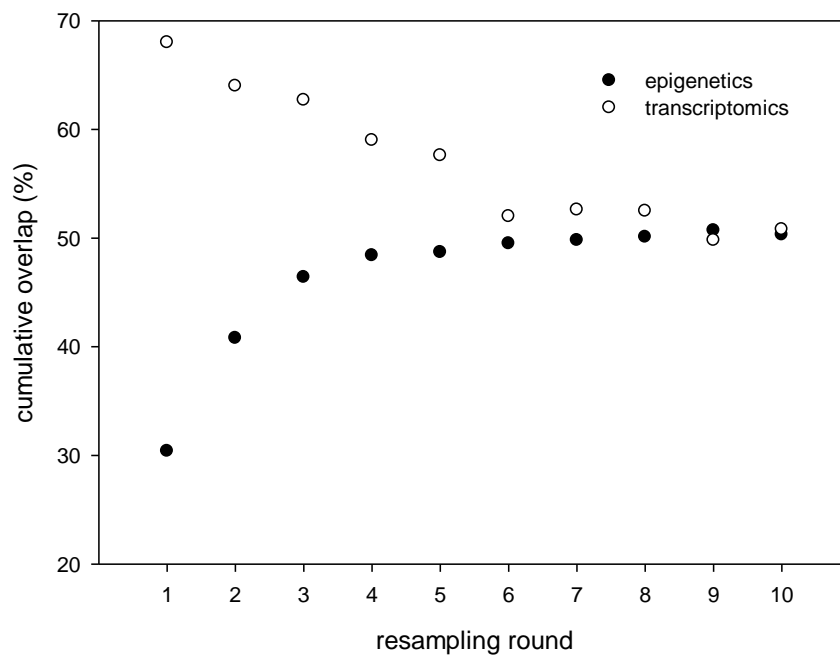

Supplement: srep42870-s1.pdf [file srep42870-s1.pdf]
